1  
2  
3  
4  
5  
6  
7  
8  
9  
10  
11  
12  
13  
14  
15  
16  
17  
18  
19  
20  
21  
22  
23  
24

## Nitric oxide radicals are emitted by wasp eggs to kill mold fungi

Short title: wasp eggs emit nitric oxide

Authors:

Erhard Strohm<sup>a1</sup>, Gudrun Herzner<sup>a</sup>, Joachim Ruther<sup>b</sup>, Martin Kaltenpoth<sup>a,c,d</sup>, Tobias Engl<sup>a,c,d</sup>

Affiliations:

<sup>a</sup> Evolutionary Ecology Group, Institute of Zoology, University of Regensburg, 93053 Regensburg, Germany.

<sup>b</sup> Chemical Ecology Group, Institute of Zoology, University of Regensburg, 93053 Regensburg, Germany.

<sup>c</sup> Insect Symbiosis Research Group, Max Planck Institute for Chemical Ecology, Hans-Knoell-Str. 8, 07745 Jena, Germany.

<sup>d</sup> current address: Evolutionary Ecology, Institute of Organismic and Molecular Evolution, Johannes Gutenberg University, Johann-Joachim-Becher-Weg 13, 55128 Mainz, Germany.

<sup>1</sup>To whom correspondence may be addressed. Erhard Strohm: Evolutionary Ecology Group, Institute of Zoology, University of Regensburg, 93053 Regensburg, Germany.

Email: [erhard.strohm@ur.de](mailto:erhard.strohm@ur.de), Tel. +49 941 9433072.

25 **Abstract: Detrimental microbes caused the evolution of a great diversity of antimicrobial**  
26 **defenses in plants and animals. Here we show that the eggs of a solitary digger wasp, the**  
27 **European beewolf *Philanthus triangulum*, emit large amounts of the gaseous free radical nitric**  
28 **oxide (NO<sup>•</sup>) to protect themselves and their provisions, paralyzed honeybees, against mold**  
29 **fungi. Despite the extraordinary concentrations of nitrogen radicals (NO<sup>•</sup> and its oxidation**  
30 **product NO<sub>2</sub><sup>•</sup>) in the brood cells (~1500ppm), NO<sup>•</sup> is synthesized from L-arginine by an NO-**  
31 **synthase (NOS) as in other animals. The beewolf *NOS* gene revealed no conspicuous differences**  
32 **to related species. However, due to alternative splicing, the NOS-mRNA in beewolf eggs lacks a**  
33 **144bp exon near the regulatory domain. This preventive external application of high doses of**  
34 **NO<sup>•</sup> by seemingly defenseless wasp eggs represents an evolutionary key innovation that adds a**  
35 **remarkable novel facet to the array of functions of the important biological effector NO<sup>•</sup>.**  
36

## 37 Introduction

38 Microbes pose a major threat to the health of all animals and plants. These have responded by  
39 evolving a great diversity of defenses including hygienic behaviors [1], antimicrobial chemicals [2-  
40 4], complex immune systems [5,6], and defensive symbioses [7,8]. Besides such pathogenic  
41 effects, many bacteria and fungi are severe, but often neglected, competitors of animals for  
42 nutrients, thus prompting the evolution of mechanisms to preserve food sources [9,10].

43

44 Some animals are particularly prone to suffer from microbial attack due to (1) high abundance of  
45 potentially harmful microbes in their environment, (2) a microbe-friendly microclimate and/or (3)  
46 limited defense mechanisms. The progeny of many insect species develop under warm and humid  
47 conditions in the soil, where they are exposed to a high diversity of bacteria and fungi. Moreover,  
48 compared to adult insects, immature stages, in particular eggs, have usually reduced abilities to  
49 prevent microbial infestation due to, for example, a thin cuticle or an inability to groom [11,12].

50 The situation is even aggravated when eggs and larvae have to develop on limited amounts of  
51 provisions that are susceptible to attack by ubiquitous and fast growing putrefactive bacteria and  
52 mold fungi [9,13].

53

54 Such hostile conditions prevail in nests of subsocial Hymenoptera like the European beewolf  
55 *Philanthus triangulum* (Hymenoptera, Crabronidae). The offspring of these solitary digger wasps  
56 develop in subterranean brood cells provisioned by the female wasps with paralyzed honeybee  
57 workers (*Apis mellifera*, Apidae, Hymenoptera) [14] (Fig. 1A). The beewolf egg is laid on one of the  
58 bees, the larva hatches after three days, feeds on the bees for six to eight days, then spins a  
59 cocoon and either emerges the same summer or hibernates. The warm and humid microclimate in  
60 the brood cell promotes larval development, but also favors fast growing, highly detrimental fungi

61 [15]. Without any countermeasures the provisions will be completely overgrown by mold fungi  
62 within three days (Fig. 1B), and the beewolf larva becomes infested by fungi or starves to death  
63 [16,17].

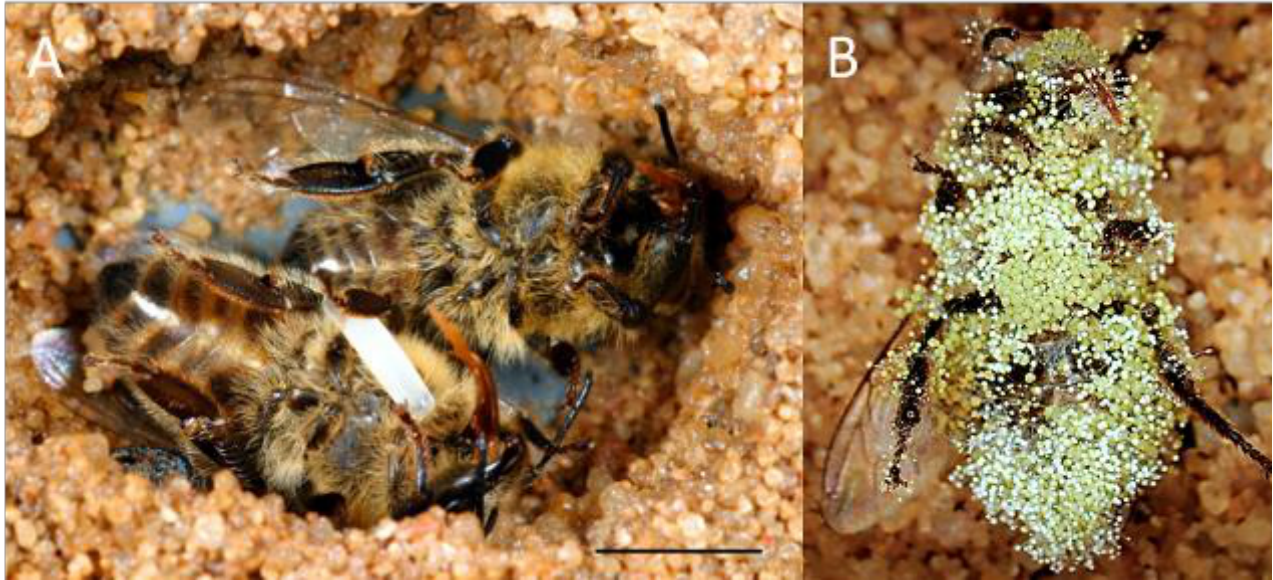

64  
65 **Figure 1.** (A) Brood cell of the European beewolf with two bees, one carrying an egg, in an observation  
66 cage. (B) Honeybee paralyzed by a beewolf female but immediately removed and kept in an artificial brood  
67 cell, heavily overgrown by mold fungi that have already developed conidia. Scale bar = 5mm.

68  
69 We have previously documented how beewolf females reduce molding of the larval provisions by  
70 coating the paralyzed bees with ample amounts of unsaturated hydrocarbons [18]. This  
71 embalming changes the physicochemical properties of the preys' surface causing reduced water  
72 condensation on the bees [19]. Due to the deprivation of water, germination and growth of fungi  
73 is delayed by two to three days [20]. Despite this considerable effect, when removed from brood  
74 cells at least 50% of embalmed bees showed fungus infestation within six days after oviposition  
75 [16]. Since in natural brood cells only around 5% of the progeny succumb to mold fungi [16], we  
76 searched for an additional antimicrobial defense mechanism.

77

78 Here we report on a unique antifungal strategy that is employed by beewolf eggs to defend  
79 themselves and their provisions against mold fungi. Employing bioassays we discovered that  
80 beewolf eggs emit a strong antifungal agent that we identified as the gaseous radical nitric oxide  
81 (NO<sup>•</sup>). We characterize the amount and time course of emission and, using histological methods,  
82 inhibition assays, and gene expression analysis, we elucidate the biosynthetic pathway of NO<sup>•</sup> in  
83 beewolf eggs. To explore the evolutionary background of this remarkable antimicrobial strategy,  
84 we sequenced the relevant gene and mRNA. Our findings reveal a novel function of the eminent  
85 biological effector NO<sup>•</sup> in providing an extended immune defense to the producer by sanitizing its  
86 developmental microenvironment.  
87  
88

## 89 Results

### 90 Emission of an antifungal volatile by beewolf eggs

91 Thorough examination of beewolf nests in observation cages [21] revealed that within 24 h after  
92 oviposition, a conspicuous pungent smell emanated from the eggs. We hypothesized that this  
93 smell was due to an antifungal agent. When paralyzed honeybees from completed beewolf brood  
94 cells were incubated individually, bees carrying an egg showed significantly delayed fungus growth  
95 compared to bees without egg over the period from oviposition to cocoon spinning (Kaplan Meier  
96 survival analysis, Breslow test, day 0-11: Chi square = 12, df = 1, p = 0.001; Fig. 2A). This difference  
97 was also significant for the period from oviposition to the hatching of the larvae (day 0-3: Chi  
98 square = 9.5, df = 1, p = 0.002), suggesting that this effect is not due to possible antifungal  
99 mechanisms of the larvae but that it is mediated by the egg. Considering the distinctive odor that  
100 emanated from the eggs, we tested whether the antifungal effect is caused by a volatile agent.  
101 Two experiments supported this assumption. First, provisioned bees without wasp eggs that were  
102 kept in artificial brood cells together with bees carrying an egg (but without physical contact)  
103 showed significantly delayed fungal growth compared to control bees that were kept alone  
104 (Breslow test, day 0-11: Chi square = 7.6 df = 1, p = 0.006; day 0-3: Chi square = 9.1, df = 1, p =  
105 0.003; Fig. 2B). Second, when one of the most abundant mold species from infested beewolf  
106 brood cells, the fast growing *Aspergillus flavus* [15], was exposed to the volatiles presumably  
107 emanating from beewolf eggs on nutrient agar for three days, its growth was entirely inhibited,  
108 whereas it thrived in controls (binomial test: N = 20, p < 0.001, Fig. 3). In analogous bioassays, five  
109 other fungal strains (*A. flavus* strain B, *Mucor circinelloides*, *Penicillium roqueforti*, *Candida*  
110 *albicans* and *Trichophyton rubrum*) were similarly inhibited when exposed to volatiles from  
111 beewolf eggs (for each strain N = 8, p < 0.01). Notably, when the beewolf larvae were removed  
112 from the assays shortly after hatching (three days after oviposition), no fungal growth occurred in

113 the exposed areas during another three days. We conclude that beewolf eggs release a volatile  
114 compound with broad spectrum fungicidal properties.  
115

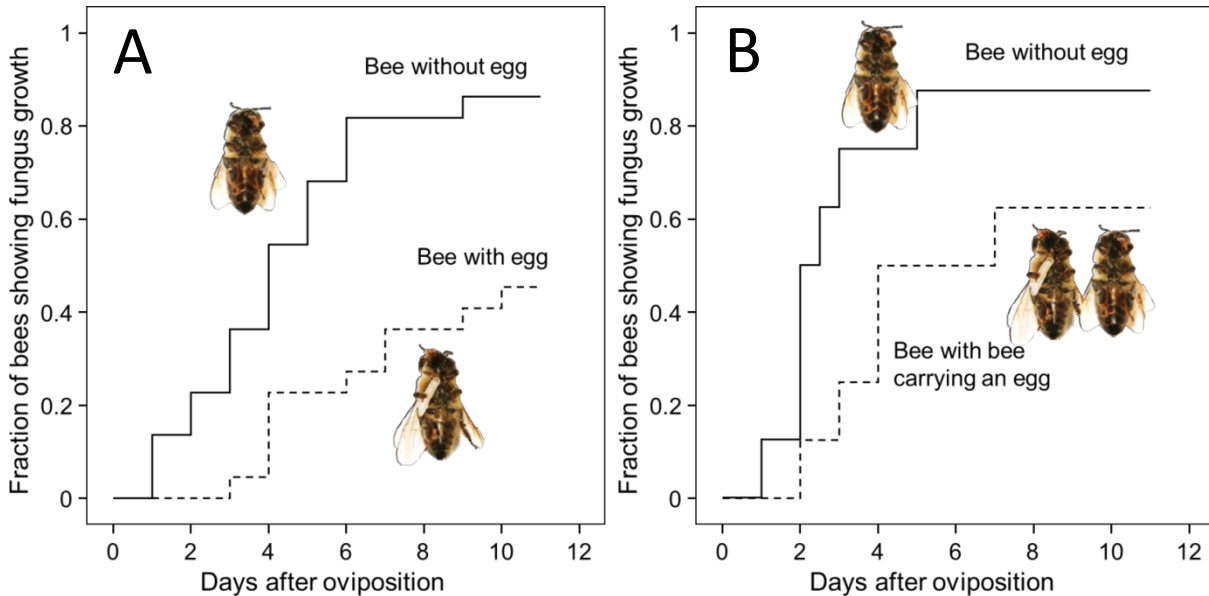

116

117 **Figure 2.** Onset of fungal growth on paralyzed honeybees taken from *Philanthus triangulum* nests and kept  
118 in artificial brood cells. The fraction of bees showing first signs of fungal growth is shown as a function of  
119 days since oviposition. (A) Honeybees that either carried an egg (dashed line) or not (solid line) (N = 22  
120 each, hazard ratio = 0.43). (B) Honeybees that were either kept alone (solid line) or shared a brood cell with  
121 a bee carrying an egg (dashed line) (N = 16 each, hazard ratio = 0.49). Source data file: Fig 2 Source data –  
122 effect of egg on fungus growth.xlsx

123

124



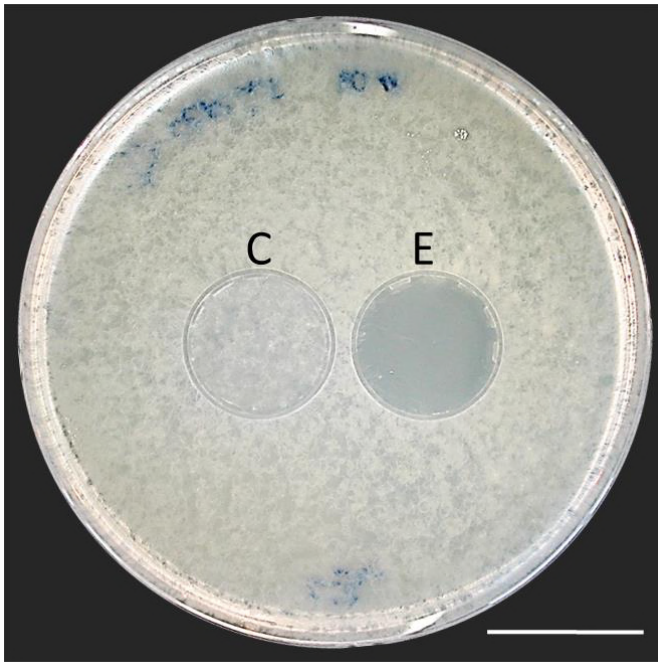

125

126 **Figure 3.** Bioassay demonstrating the inhibitory effect of a beewolf egg against *Aspergillus flavus*. Two areas  
127 on the agar were covered by caps of a volume similar to natural beewolf brood cells. One cap, the control  
128 (C), was empty, while the experimental cap (E) contained a fresh beewolf egg attached to the ceiling of the  
129 cap. The caps were removed and the picture was taken after 24 h of incubation at 25°C. The control area  
130 (C) shows dense whitish fungal hyphae similar to the surroundings. However, the area that was exposed to  
131 the volatiles from a beewolf egg (E) shows bare agar, indicating that the growth of this aggressive fungus  
132 was entirely inhibited. Scale bar = 2.5 cm

133

### 134 Identification of the antifungal volatile

135 The odor emanating from the eggs was similar to that of highly reactive oxidants such as chlorine,  
136 ozone and nitrogen dioxide [22]. The most likely candidate was the radical nitrogen dioxide ( $\text{NO}_2^\cdot$ ),  
137 because there is a plausible way for it to be generated by wasp eggs: Insect embryos synthesize  
138 small amounts of nitric oxide ( $\text{NO}^\cdot$ ) as signaling effectors for developmental processes [23]. If such  
139 odorless  $\text{NO}^\cdot$  was emitted from the egg, it would spontaneously react with oxygen [24,25] to yield  
140 the strong-smelling  $\text{NO}_2^\cdot$ . Moreover, belonging to the reactive nitrogen species (RNS),  $\text{NO}^\cdot$  and  $\text{NO}_2^\cdot$   
141 show considerable antimycotic activity [26,27] that would explain the observed fungicidal effect of  
142 beewolf eggs.



143

144 We conducted a series of experiments to determine whether beewolf eggs produce and emit NO<sup>•</sup>  
145 and/or NO<sub>2</sub><sup>•</sup>. First, headspace samples of confined beewolf eggs were subjected to the Griess  
146 assay, the standard procedure for the specific detection of NO<sup>•</sup> and NO<sub>2</sub><sup>•</sup> [28]. The emerging red  
147 color of the resulting azo dye clearly indicated the presence of NO<sup>•</sup>/NO<sub>2</sub><sup>•</sup>. To visualize the emission  
148 of NO<sup>•</sup> from beewolf eggs, we sprayed a solution of an NO<sup>•</sup> specific fluorescent probe,  
149 Diaminorhodamin-4M AM (DAR4M-AM), onto prey bees carrying freshly laid eggs. The small  
150 droplets of the DAR4M-AM solution on the bees showed a clear fluorescence around the egg that  
151 increased over several hours (Fig. S1B). No such effect was seen on control bees without eggs (Fig.  
152 S1A). Moreover, beewolf eggs injected with the DAR4M-AM solution showed a strong  
153 fluorescence that peaked about one day after oviposition (N = 45, Fig. 4A). The same treatment  
154 yielded only weak fluorescence in the eggs of two other Hymenoptera (the Emerald cockroach  
155 wasp, *Ampulex compressa*, N = 9, and the Red mason bee, *Osmia bicornis*, N = 12; Figs. 4C and D)  
156 and in newly hatched beewolf larvae (N = 4, not shown). Autofluorescence of beewolf eggs  
157 injected with buffer only (N = 10) was negligible (Fig. 4B). These findings strongly imply that  
158 beewolf eggs produce and release NO<sup>•</sup>, which spontaneously reacts with oxygen to NO<sub>2</sub><sup>•</sup> radicals.

159

160 **Figure S1.** Visualization of NO<sup>•</sup> emission by beewolf eggs using fluorescence imaging. (A) Honeybee from a  
161 brood cell without an egg and (B) honeybee with egg. Both bees were sprayed with a solution of the NO<sup>•</sup>  
162 specific fluorescence probe DAR4M-AM. Only the droplets on the bee with the egg (B) show a bright yellow  
163 and orange fluorescence indicating the presence of NO<sup>•</sup>. Image is a composite of multiple pictures of the x/y  
164 plane and z-axis. Scale bar = 1 mm.

165

166 Amount and time course of NO<sup>•</sup> emission

167 Using iodometry, we determined that a beewolf egg emits on average  $0.25 \pm 0.09 \mu\text{mol NO}^{\cdot}$  (N =  
168 233). The rate of  $\text{NO}^{\cdot}$  production was initially very low, but increased to a distinct peak 14-15 h (at  
169  $28^{\circ}\text{C}$ ) after oviposition (Fig. 5); around 90 % of  $\text{NO}^{\cdot}$  emission occurred within a two-hour period.  
170 Assuming no loss due to reactions or leaking out of the confined space of brood cells (volume  $3.2 \pm$   
171  $0.9 \text{ cm}^3$ , N = 250), the nitrogen oxides would accumulate to average concentrations of  $1690 \pm 680$   
172 ppm. The timing of the onset of  $\text{NO}^{\cdot}$  emission was strongly temperature dependent (Fig. S2), with  
173 higher temperatures resulting in an earlier  $\text{NO}^{\cdot}$  production (temperature coefficient  $Q_{10} = 2.74$ ).  
174

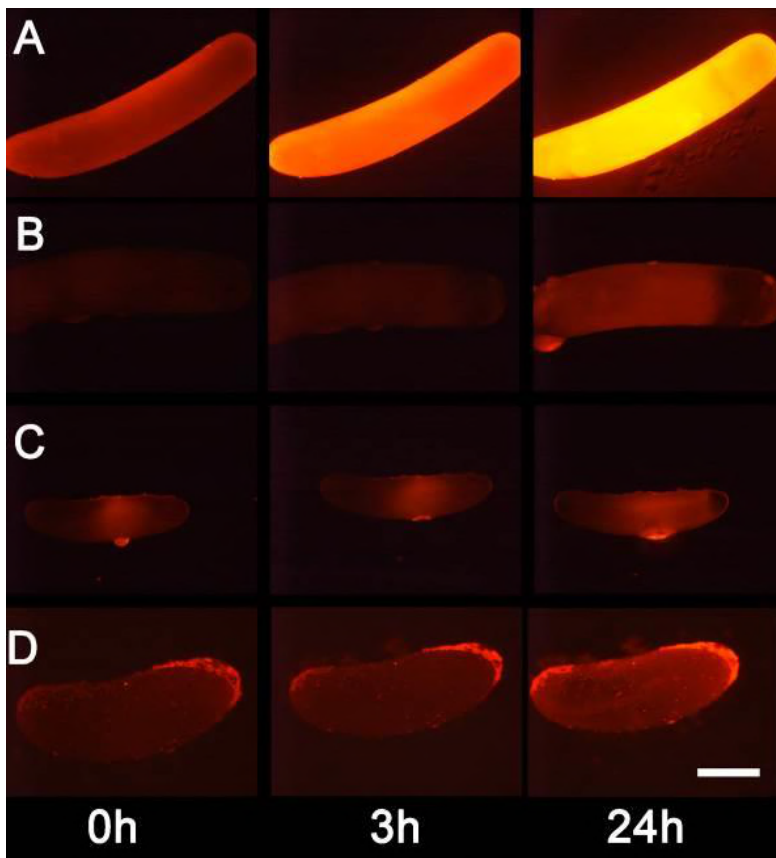

175  
176 **Figure 4.** Detection of nitric oxide ( $\text{NO}^{\cdot}$ ) in beewolf eggs. Newly laid eggs of beewolves, *Philanthus*  
177 *triangulum*, of the cockroach wasp *Ampulex compressa* and of the Red Mason bee, *Osmia bicornis* were  
178 injected with the  $\text{NO}^{\cdot}$  sensitive fluorescence probe DAR4M-AM. Control beewolf eggs were injected with  
179 phosphate buffer. Images were obtained by fluorescence microscopy 0, 3 and 24 h after injection. Row A:  
180 DAR4M-AM injected beewolf egg showing strong increase in fluorescence; B: Buffer-injected control

181 beewolf egg showing the level of autofluorescence; C: DAR4M-AM injected egg of *A. compressa*; D:  
182 DAR4M-AM injected egg of *O. bicornis*. Scale bar: 1 mm.

183

184 **Figure S2.** Start of NO<sup>•</sup> emission (h after oviposition) as a function of temperature. Beewolf eggs were kept  
185 at different temperatures and the onset of NO<sup>•</sup> release was assessed using the color change of an iodide  
186 starch solution as monitored by a digital camera at 30min intervals. Symbols are means  $\pm$  SD (Quadratic  
187 regression:  $R^2 = 0.98$ ,  $N = 33$ ,  $p < 0.001$ ;  $Q_{10} = 2.74$ ). Source data file: Fig S2 Source data - start of NO  
188 emission.xlsx

189

190

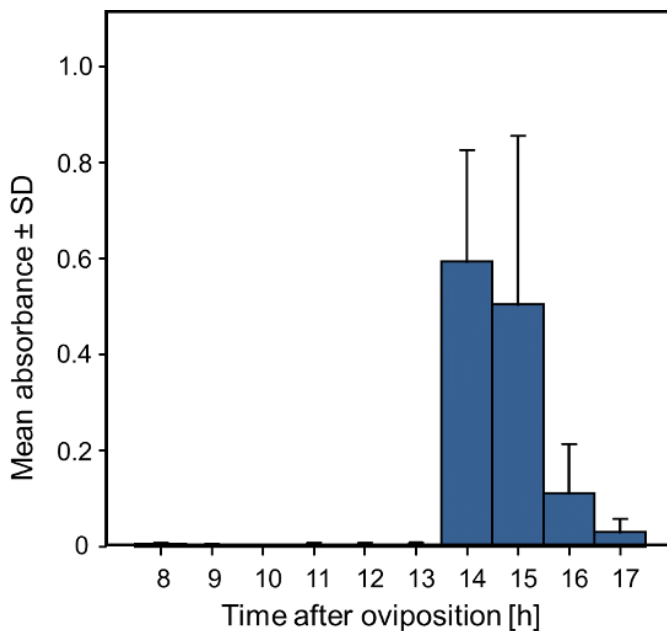

191

192 **Figure 5.** Timing of NO<sup>•</sup> emission from beewolf eggs ( $N = 4$ ). The photometrically determined absorbance at  
193 590 nm (mean  $\pm$  SD) is shown as a function of time after oviposition for iodide-starch solutions successively  
194 exposed to beewolf eggs for one hour. Source data file: Fig 5 Source data - timing of NO emission.xlsx

195

196 Synthesis of NO<sup>•</sup> in beewolf eggs

197 Eukaryotes synthesize NO<sup>•</sup> from the amino acid L-arginine by the enzyme nitric oxide synthase

198 (NOS) [29] which is highly conserved also in insects [30]. The exceptional level of NO<sup>•</sup> emission of

199 beewolf eggs raised the question of whether they employ the same pathway or have evolved a  
200 different mechanism. Using the fixation insensitive nicotinamide-adenine-dinucleotide phosphate  
201 (NADPH) -diaphorase assay, we found evidence for NOS activity of embryonic tissue in beewolf  
202 eggs (Fig. S3). Moreover, by employing reverse transcription and real time quantitative PCR, we  
203 revealed that the temporal expression pattern of NOS-mRNA showed a clear peak around the time  
204 of maximum NO<sup>·</sup> emission (Fig. S4). To directly test for the involvement of NOS we injected  
205 beewolf eggs with N $\omega$ -nitro-L-arginine methylester (L-NAME), a NOS-inhibiting analogue of L-  
206 arginine. This treatment caused a significant decrease in NO<sup>·</sup> emission, whereas the non-inhibiting  
207 enantiomer D-NAME had no such effect (Fig.6). We therefore conclude that in beewolf eggs, NO<sup>·</sup> is  
208 synthesized from L-arginine via NOS.

209

210 **Figure S3.** Photomicrograph of a longitudinal section of a beewolf egg showing fixation insensitive NADPH-  
211 diaphorase activity. Strong blue staining in the embryonic tissue indicates the presence of reduced  
212 nitroblue tetrazolium demonstrating NOS activity (c=cuticle, s=serosa, e= embryo, a=amnion, ac= amnion  
213 cavity, scale bar = 1 mm, image composed from two separate photos of the left and right parts of the egg.).

214

215 **Figure S4.** Gene expression of NOS relative to  $\beta$ -actin in beewolf eggs at different times after oviposition  
216 and in freshly hatched larvae. Two trials were conducted, one with 19 and one with 24 eggs per time point.  
217 Mean ratios of NOS-mRNA to  $\beta$ -Actin-mRNA are shown (with standard deviations), as determined by Q-RT-  
218 PCR. Source data file: Fig S4 Source data - NOS gene expression.xlsx

219

220

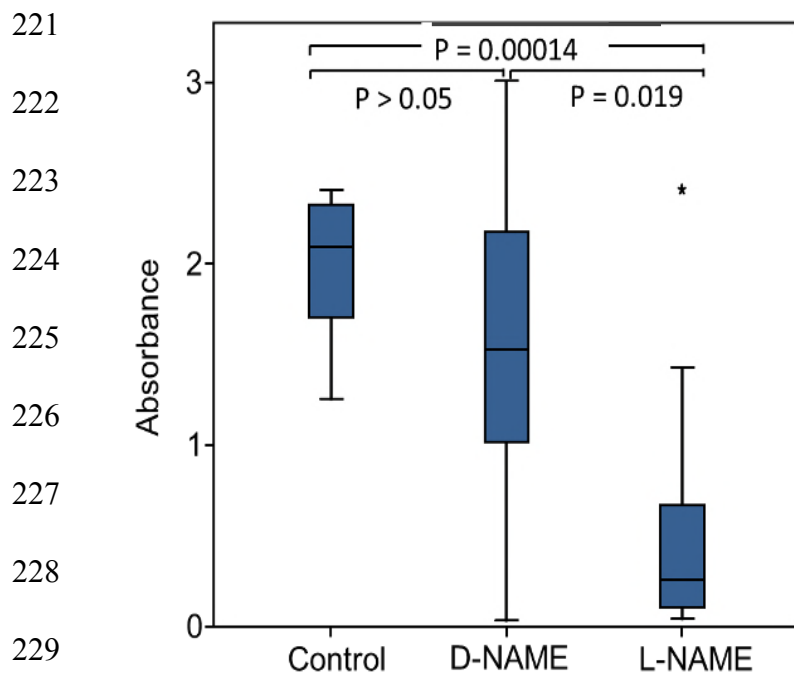

230

231 **Figure 6.** Effect of NOS inhibition on NO<sup>-</sup> production. Amount of NO<sup>-</sup> and/or NO<sub>2</sub><sup>-</sup> emanating from non-  
232 injected beewolf eggs (control) and those injected with D-NAME (a non-inhibiting enantiomer of L-NAME)  
233 or L-NAME (a NOS inhibiting L-arginine analogue). The photometrically determined absorbance at 590 nm is  
234 shown for iodide-starch solutions that were exposed for 24 h to the headspace of eggs of the indicated  
235 treatment group (shown are median, quartiles and range, \* indicates an outlier, included in the analysis). P-  
236 values are for Holm-corrected Mann-Whitney U-tests. Source data file: Fig 6 source data – NOS  
237 inhibition.xlsx

238

239 The beewolf *NOS*-gene and *NOS*-mRNA in eggs

240 In contrast to vertebrates, most invertebrates appear to have only one type of NOS [31,32].

241 Considering the high level of NO<sup>-</sup> production in beewolf eggs, we hypothesized that beewolves

242 have more than one *NOS* gene or that the *NOS* responsible for the NO<sup>-</sup> synthesis in beewolf eggs

243 might exhibit considerable changes in enzyme structure compared to the *NOS* of related species.

244 Sequencing of the *NOS*-gene(s) of *P. triangulum* (*Pt-NOS*) revealed only one *Pt-NOS* copy in the

245 beewolf genome comprising 9.36 kbp with 25 exons (Fig. S5). A phylogenetic analysis of the

246 resulting amino acid sequence revealed a high similarity to the NOS of the closely related bees  
247 (Apidae, Fig. S6). However, mRNA sequencing showed that, in contrast to adult beewolves and  
248 honeybees, the NOS-mRNA of beewolf eggs (3.72 kbp) lacks exon 14 comprising 144 bp. In the  
249 NOS-mRNA of adult beewolves this exon is located between the binding domains for calmodulin  
250 and flavin mononucleotide (FMN) (Fig. S5).

251

252 **Figure S5.** Structure of the *Pt-NOS* gene indicating position and length of exons. Exon 14 (red) is missing in  
253 the NOS mRNA in beewolf eggs compared to adults. Presumed cofactor-binding domains as deduced from  
254 homologous sequences of the *NOS* of *Anopheles stephensi* [68, 69] are indicated for heme, calmodulin  
255 (CaM), FMN, FAD pyrophosphate (FAD PPi) and FAD isoalloxazine (FAD Iso), NADPH ribose, NADPH adenine,  
256 and NADPH.

257

258 **Figure S6.** Consensus tree obtained from Bayesian analysis of NOS amino acid sequences from five orders  
259 of insects (distinguished by different colors), including the NOS sequences of *P. triangulum* eggs (lowermost  
260 entry). Values at the nodes represent Bayesian posterior probabilities and local support values (FastTree  
261 analysis), respectively. Scale bar represents 0.1 changes per site.

262

263

264

## 265 Discussion

266 Fighting pathogens is of outstanding importance for any organism and has driven the evolution of  
267 a great diversity of antimicrobial defenses. Internal immune systems have been extensively  
268 documented especially in vertebrates [33-34] but also in insects [35,36], including insect eggs [37].  
269 However, comparatively little is known about external antimicrobial strategies that provide  
270 protection for the own body, for the progeny, or for food. There are some reports on the  
271 application of antimicrobial secretions on the body surface by adult insects [11,38] or inside a host  
272 by larvae of a parasitoid wasp [2]. Carrion beetles preserve the larval food, buried carcasses, by  
273 application of antimicrobials [39]. Females of some insect species deposit antimicrobial chemicals  
274 [40,41] or antibiotics producing symbiotic bacteria [8, 42] onto their eggs and ant workers can  
275 counter microbial infestation of the brood by applying venom [43]. Recently, the employment of  
276 volatile antimicrobials by insects as a means of external defense has gathered some interest  
277 [4,44,45].

278

279 Like other insects that develop in the soil, beewolves are particularly menaced by a diverse and  
280 unpredictable range of detrimental microbes. In fact, beewolf progeny and their provisions are  
281 under severe threat from fast growing mold fungi [16]. As a consequence, beewolves have evolved  
282 at least three very different antimicrobial defenses that provide an effective, coordinated, and  
283 enduring protection against a broad spectrum of microbes during the whole development. First,  
284 throughout the long period of winter diapause prior to emergence progeny are protected by  
285 antibiotics on their cocoons that are produced by symbiotic *Streptomyces* bacteria [7,46,47].  
286 Second, during the early egg and larval stages, molding of the provisions is retarded by an  
287 embalming of the honeybees with lipids by the mother wasp [16]. Third, as shown here, the  
288 emission of gaseous nitrogen oxide radicals by the beewolf egg might be the most important of



289 the three antimicrobial mechanisms since it takes effect in a very early developmental phase and it  
290 results not only in delay of molding but in killing of detrimental fungi in their immediate  
291 environment. Thus brood cell fumigation provides beewolf offspring with a decisive initial  
292 advantage over the fast growing mold fungi.

293

294 The emission of a gaseous agent by beewolf eggs to their confined brood cells is an ideal way to  
295 sanitize such intricately structured surfaces as the bodies of honeybees and the rough walls of the  
296 brood cell. NO<sup>·</sup> seems to be a most suitable gaseous agent because it can obviously be produced  
297 by beewolf eggs in amounts that effectively kill mold fungi in their brood cell. Such volatile  
298 sanitation mechanisms that provide a front-line defense against microbes [4] will mostly be  
299 inconspicuous and might turn out to be a wider theme in nature.

300

301 NO<sup>·</sup> is an ancient biological effector of immense importance in all kinds of organisms ranging from  
302 procaryotes to higher plants and animals [29, 48]. Owing to its high diffusibility across  
303 biomembranes and specific chemical properties, this gaseous radical plays a crucial role in a  
304 multitude of biological processes [29, 48]. In vertebrates, NO<sup>·</sup> is synthesized from L-arginine by  
305 three different isoforms of NOS that are encoded by different genes [29, 48]. Low levels of NO (<  
306 1µmol/l) are produced by constitutive NOS (cNOS) isoforms (endothelial eNOS, neuronal nNOS)  
307 and have signaling functions, e.g. in neuronal development and in the regulation of vascular tone  
308 in vertebrates. Higher NO<sup>·</sup> concentrations (1-10 µmol/l, [49]) are generated by an inducible NOS  
309 (iNOS). At such levels NO<sup>·</sup> is highly cytotoxic [49], making it a powerful antimicrobial [26,27], for  
310 example in macrophages [29]. However, overproduction of NO<sup>·</sup> due to inflammatory processes  
311 [50] or certain diseases (e.g. Alzheimer's disease, [51]) may cause harmful side-effects [52] and  
312 even septic shock [53]. Moreover, NO<sup>·</sup> might affect carcinogenesis and tumor progression in a  
313 positive as well as in a negative way [54].

314

315 In living tissues, NO<sup>•</sup> is usually removed within seconds by reacting with the heme group of  
316 molecules such as oxyhemoglobin [55,56] (very low concentrations may still persist for hours [48]).  
317 In air, the autooxidation to NO<sub>2</sub><sup>•</sup> is comparatively slow so that NO<sup>•</sup> persists (depending on its  
318 concentration) for several seconds to minutes [25,56] or even hours [24]. Thus, the NO<sup>•</sup> emitted by  
319 beewolf eggs might directly affect fungi, e.g. by damaging DNA [27,57] or by reacting with the  
320 heme group of enzymes like cytochrome P450 and cytochrome c oxidase, thus inhibiting these  
321 crucial components of the mitochondrial respiratory chain [49,58,59,60]. Yet, most of the  
322 antimicrobial activity of NO<sup>•</sup> is attributed to indirect effects via reactive nitrogen species (RNS), in  
323 particular nitrogen oxides (NO<sub>2</sub><sup>•</sup>, N<sub>2</sub>O<sub>3</sub>) and peroxynitrite (ONOO<sup>-</sup>, upon reaction with superoxide)  
324 [49]. NO<sub>2</sub><sup>•</sup>, has been reported to be severely cytotoxic, e.g. by nitration of tyrosine residues and  
325 oxidation of proteins and lipids [26,60].

326

327 Even assuming some loss due to reactions or diffusion, the estimated maximum concentration of  
328 nitrogen oxides (NO<sup>•</sup> and NO<sub>2</sub><sup>•</sup>) in beewolf brood cells (more than 1500 ppm or 60 μmol/l) vastly  
329 exceeds the concentrations in tissues (mostly lower than 0.1 μmol/l [56], 0.85-1.3 μmol/l in muscle  
330 tissue [61]). The maximum concentration in beewolf brood cells might thus be even higher than  
331 what is used in medical applications against multiple drug resistant bacteria (200 ppm NO<sup>•</sup> [62]) or  
332 in antifungal treatment of fruit (50-500 ppm NO<sup>•</sup> [63]) and is far beyond permissible exposure  
333 limits for humans (e.g. for the USA: 25 ppm for NO<sup>•</sup>, 5 ppm for NO<sub>2</sub><sup>•</sup> [64]).

334

335 A beewolf egg of approximately 5 mg emits 0.25 μmol NO<sup>•</sup> within a period of about 2.5 h, or  
336 20.000 μmol/kg\*h, a value that is about four orders of magnitude higher than reported baseline  
337 levels of NO<sup>•</sup> synthesis in humans (0.15 - ~4.5 μmol/kg\*h [65]), rats (0.6-9 μmol/kg\*h [66]) and  
338 plants (*Arabidopsis thaliana*, 0.36-3 μmol/kg\*h [67]), and even considerably higher than in

339 lipopolysaccharide (LPS)-activated macrophages (~800  $\mu\text{mol}/\text{kg}\cdot\text{h}$ , estimated from [66]). Despite  
340 this extremely high rate of  $\text{NO}^{\cdot}$  production in beewolf eggs, the amino acid sequence of the  
341 beewolf NOS (*Pt-NOS*) is similar to the closely related bees (Fig. S6), indicating that there was little  
342 evolutionary change with regard to the gene itself. Moreover, the structure of the *Pt-NOS* gene is  
343 largely homologous to other insects, e.g. *Anopheles stephensi* mosquitoes [68].  
344  
345 However, in contrast to adult bees, the NOS-mRNA in beewolf eggs lacks exon 14 (Fig. S5).  
346 Such alternative splicing that results in different NOS-mRNAs, including the deletion of exons (but  
347 others than in bees), has been documented in *A. stephensi* in response to *Plasmodium*  
348 infection [69]. Moreover, NOS splice variants may result in organ-specific enzymes in other  
349 organisms [29]. Presumably, beewolf eggs produce smaller amounts of another NOS splice variant  
350 to support signaling functions in the developing embryo.  
351  
352 In adult bees, the exon missing in the NOS-mRNA of eggs is located between the binding  
353 domains for calmodulin and FMN. Since calmodulin is believed to be responsible for NOS  
354 regulation [70] the deletion of an adjacent part might affect the control of NOS activity in beewolf  
355 eggs. Thus, the alternative splicing might enable the production of such large amounts of  $\text{NO}^{\cdot}$ .  
356 Notably, compared to the cNOS (comprising eNOS, and nNOS) the inducible NOS isoform of  
357 vertebrates (iNOS) that generates higher concentrations of  $\text{NO}^{\cdot}$  to combat microbes lacks a section  
358 of about 40 amino acids (120 bp) near the FMN domain. Interestingly, this section is thought to be  
359 responsible for autoinhibition of the cNOS [71] and its lack enhances  $\text{NO}^{\cdot}$  production by the iNOS.  
360 The conspicuous similarity between vertebrate iNOS and the NOS in beewolf eggs with regard to  
361 the length of the missing section and its position might suggest a convergent modification to  
362 achieve a NOS with high synthetic capacity. Whereas vertebrates have evolved another gene,  
363 beewolf eggs appear to accomplish a similar effect by alternative splicing of the mRNA.

364

365 The lack of an exon that might circumvent regulation of the NOS and the pattern of *Pt-NOS*  
366 expression in the eggs suggest that in beewolf eggs the activity of the enzyme is regulated by gene  
367 expression like the NOS in *Plasmodium* infested *A. stephensi* [68] and the iNOS of vertebrates  
368 [72,73]. However, in contrast to these cases, in beewolf eggs expression of the Pt-NOS seems not  
369 to be induced by immunostimulants but to occur obligatorily at a certain stage in the development  
370 of the beewolf embryo.

371

372 Even the combined effect of prey embalming and brood cell fumigation does not provide perfect  
373 protection as fungus infestation still causes larval mortality in 5% of the brood cells in the field  
374 [16]. Some fungal spores might survive under the bees because they were screened against the  
375 gas. Another possibility, namely that strains of the ubiquitous mold fungi that are the main causes  
376 of molding in beewolf brood cells [15], have evolved resistance against the toxic effects of  
377 NO<sup>•</sup>/NO<sub>2</sub><sup>•</sup> seems rather unlikely. There are examples for detoxification of lower concentrations of  
378 NO<sup>•</sup> (mainly by scavengers like flavohemoglobins) in different fungi, including species of *Aspergillus*  
379 [75,76]. However, the NO<sup>•</sup>/NO<sub>2</sub><sup>•</sup> levels emitted by beewolf eggs are very high and likely affect  
380 several very basic biochemical processes, thus making the evolution of an effective resistance  
381 unlikely. Moreover, beewolf brood cells are certainly a rare habitat for the ubiquitous mold fungi  
382 so that there will be only weak selection for resistance at all.

383

384 While brood cell fumigation clearly retards molding of larval provisions, the antimicrobial effect of  
385 NO<sup>•</sup> and NO<sub>2</sub><sup>•</sup> might harm the symbiotic *Streptomyces* bacteria that beewolf females apply to the  
386 brood cell prior to egg laying [7,46]. Since the symbiotic bacteria are important for the survival of  
387 larvae in the cocoon and are vertically transmitted from beewolf mothers to their daughters [47],  
388 a considerable number of symbionts have to survive the brood cell fumigation. Possibly, the

389 symbiotic bacteria are resistant to NO<sup>•</sup>/NO<sub>2</sub><sup>•</sup>. However, that the bacteria are applied to the ceiling  
390 of the brood cell might be an adaptation that reduces possible negative effects of the nitrogen  
391 oxides since these are heavier than air and will accumulate in the lower part of the brood cell.  
392 Additionally, the bacteria are embedded in copious amounts of a secretion consisting of mostly  
393 unsaturated hydrocarbons [77] that might shield the bacteria from the fumigants. Moreover,  
394 antioxidants in the hydrocarbon matrix could detoxify NO<sup>•</sup> and NO<sub>2</sub><sup>•</sup> and protect the symbiotic  
395 *Streptomyces* bacteria.

396

397 How could brood cell fumigation with high concentrations of NO<sup>•</sup>/NO<sub>2</sub><sup>•</sup> have evolved? Generally, it  
398 has been assumed that the primary purpose of NO<sup>•</sup> was signaling at low concentrations and that  
399 the antimicrobial functions of higher concentrations are derived [78]. Assuming a similar scenario  
400 for beewolves, small amounts of NO<sup>•</sup> that were originally produced for developmental processes  
401 [23] might have accidentally been released into the confines of the subterranean brood cell and  
402 slightly affected the germination or growth of fungi by interfering with regulatory processes  
403 [29,79]. Given the severe threat posed by microbes, such initial benefits would have caused strong  
404 selection for elevated NO<sup>•</sup> emission by the eggs. This would have considerably increased progeny  
405 survival and might have allowed ancestral beewolves to nest in an expanded range of habitat  
406 types, including nesting sites with high risk of microbial infestation, or to exploit highly susceptible  
407 but readily available prey species. Brood cell fumigation with large doses of NO<sup>•</sup> thus represents a  
408 key evolutionary innovation. Since NO<sup>•</sup> is used as an antimicrobial in the immune systems of many  
409 animals [80], its deployment as an antifungal gas can be viewed as an innate, externalized immune  
410 defense of beewolf eggs. Such externalized components of the immune system have recently been  
411 recognized as important and possibly widespread antimicrobial measures [38].

412

413 The clear benefit of brood cell fumigation, however, is probably accompanied by substantial costs  
414 in terms of energy and biochemical resources [31]. NO<sup>·</sup> is synthesized from L-arginine, an amino  
415 acid that is an important constituent of many proteins and biochemical pathways [81] and it is an  
416 essential amino acid for most insects [82,83] (e.g. phytophagous insects [84], mosquitos [85],  
417 aphids [86,87], butterflies [88, 89], true bugs [90], parasitoid wasps [91,92], bees [93,94]). Thus,  
418 beewolves have either evolved the capacity to synthesize L-arginine or female beewolves have to  
419 provide each egg with sufficient L-arginine for both brood cell fumigation and embryogenesis.  
420 Moreover, NO<sup>·</sup> synthesis by NOS requires the cofactors flavin adenine dinucleotide (FAD), FMN,  
421 (6R-)5,6,7,8-tetrahydrobiopterin (BH4) and NADPH [95], thus competing with other metabolic  
422 pathways in the developing beewolf embryo.

423

424 One of the most remarkable aspects of our study is that the embryos inside the egg survive the  
425 high concentrations of toxic nitrogen oxides during synthesis and emission as well as after its  
426 release to the brood cell. This is all the more surprising since beewolf larvae that were accidentally  
427 exposed to the gas emitted by eggs died (Strohm, unpublished observations). The synthesis and  
428 emission of such high amounts of NO<sup>·</sup> likely requires a number of concomitant adaptations that  
429 protect beewolf embryos against the cytotoxic effects of high concentrations of nitrogen radicals.  
430 One possibility is the employment of carrier molecules to transfer NO<sup>·</sup> to the egg shell. In blood  
431 sucking hemipterans, for example, nitrophorins carry NO<sup>·</sup> to its release site to dilate blood vessels  
432 [96]. The mechanistic basis of NO<sup>·</sup> tolerance of beewolf eggs is of particular interest, since  
433 excessive production of NO<sup>·</sup> due to inflammatory processes [97] or certain diseases (e.g.  
434 Alzheimer's disease, [51,52,98,99]) might cause severe pathological complications in humans.  
435 Thus, understanding how beewolf eggs avoid the toxic effects of NO<sup>·</sup> might inspire the  
436 development of novel medical applications.

437

438 Our findings reveal a surprising adaptation in a mass-provisioning digger wasp to cope with the  
439 threat of pathogen infestation in the vulnerable egg and larval stages. Sanitizing the brood cell  
440 environment by producing high amounts of NO<sup>•</sup> significantly enhances the survival of immatures  
441 by reducing fungal growth on their provisions. Given that mass-provisioning and development  
442 underground are widespread ecological features among digger wasps and bees and considering  
443 the difficulties of detecting volatiles in subterranean nests, such gaseous defenses might be more  
444 widespread and as yet underappreciated. In addition to revealing new perspectives on  
445 antimicrobial strategies in nature and amplifying the biological significance of NO<sup>•</sup>, beewolves offer  
446 unique opportunities to elucidate general questions on the evolution and regulation of NOS as  
447 well as the production of and resistance to high concentrations of NO<sup>•</sup>.  
448



## 449 **Methods**

### 450 **Animals**

451 Beewolf females, *Philanthus triangulum* F. (Apoidea, Crabronidae), were either caught in the field  
452 from populations in Franconia (Germany) or were the F1 progeny of such females kept in the  
453 laboratory. They were housed in observation cages [21] that provided access to newly completed  
454 brood cells. The cages were placed in a room with temperature control (20-22° at night, 25-28°C in  
455 the daytime) and were lit for 14 h per day by neon lamps. Honeybees, *Apis mellifera* L. (Apoidea,  
456 Apidae), the females' prey, were caught from hive entrances or from flowers and provided *ad*  
457 *libitum*. Honey was provided *ad libitum* in the flight cage for the nutrition of both honeybees and  
458 beewolf females.

459

460 To obtain freshly laid eggs, observation cages were checked hourly. Completed brood cells were  
461 opened, their length and width was measured using calipers and the egg and/or honeybees were  
462 removed and used for the experiments. Brood cell volume was estimated as a prolate spheroid  
463 with brood cell length as the major and width as the minor axis. The bees in brood cells had been  
464 paralyzed, embalmed with lipids [18], and provisioned by beewolf females. Egg volume was  
465 estimated to be  $4.1 \pm 0.5 \text{ mm}^3$  (N = 16) by calculating the volume of a cylinder with the respective  
466 length and width of an egg (both determined using a stereomicroscope with eyepiece  
467 micrometer).

468

### 469 **General experimental procedures**

470 For all experiments beewolf eggs were harvested from brood cells of various females. Eggs were  
471 randomly allocated to different treatment groups. Sample sizes refer to independent biological  
472 replicates, i.e. each replicate represents a different egg or brood cell – with the exception of

473 quantitative PCR, where several eggs were pooled for one sample (see below). As it is very  
474 demanding to obtain beewolf eggs, the availability of eggs of a certain developmental stage was  
475 limited. Generally, we used as many eggs as feasible (e.g. for quantitative PCR). For some  
476 experiments we decided on a meaningful sample size based on experience from preliminary  
477 experiments (e.g. we already knew that inhibition assays with beewolf eggs in Petri dishes were  
478 really clear-cut and required only few replicates). Moreover, due to the limited availability of  
479 beewolf eggs on a given day, replicates were conducted consecutively over several days.

480

481 Fungus inhibition assays

482 To test whether the time course of fungus growth on bees differed between those carrying an egg  
483 and those without egg, we used brood cells (N = 22) that had been provisioned with two bees. We  
484 placed each bee individually into an artificial brood cell of natural shape and volume in sand-filled  
485 Petri dishes (diameter 10 cm) and with moisture levels similar to natural conditions. Petri dishes  
486 were placed in a climate chamber at 25°C in the dark. Bees were carefully checked visually every  
487 24 h for fungus growth without opening the Petri dishes. First signs of fungus infestation (hyphae)  
488 were recorded. The experiment was terminated after eleven days since all larvae had finished  
489 feeding and spun a cocoon by then. Since these are time event data, we used survival analysis  
490 (Kaplan Meier, Breslowe test, SPSS Statistics 21) to compare the timing of fungus infestation of the  
491 bees with and without an egg. Larvae hatched on the third day after oviposition and started to  
492 feed on the bee. There was no evidence that hatched larvae were able to prevent fungus growth  
493 on the bee they occupied or others in the brood cell. However, to take a possible effect of the  
494 larva on the experimental bee into account, we carried out the analysis not only over the whole  
495 period from oviposition until the larvae spun into a cocoon (11 days) but also for the period from  
496 oviposition to the hatching of larvae (3 days). A significant difference already until the third day  
497 indicates that this effect was associated with the egg.

498

499 We examined whether beewolf eggs emit a volatile antimicrobial by conducting two experiments.

500 For the first test, we used brood cells (N = 16) that contained three bees. The bees were

501 transferred to artificial brood cells in sand-filled Petri dishes as described above. The bee with the

502 egg and one of the bees without egg (the experimental bee) were placed together in the same

503 artificial brood cell but without physical contact. The other bee without egg (the control) was kept

504 alone in another artificial brood cell (in another Petri dish). We monitored the timing of fungus

505 infestation, as described above. We used survival analysis as described above. Again, to take an

506 (unlikely) effect of the larva into account, we also carried out the analysis for the period from

507 oviposition until the larvae hatched (day 3 after oviposition). A significant difference already until

508 day three could only be caused by volatiles emanating from the egg.

509

510 For the second assay, we exposed conidiospores of a diverse spectrum of fungi to the volatiles

511 emanating from beewolf eggs. Petri dishes (10 cm) containing culture medium (malt extract agar

512 or Sabouraud-agar [100]) were inoculated with conidia from different fungal strains (*Aspergillus*

513 *flavus* strain A, Trichocomaceae, that was isolated from infested beewolf brood cells, [15], N = 20;

514 *A. flavus* strain B, *Mucor circinelloides*, Mucoraceae; *Penicillium roquefortii*, Trichocomaceae;

515 *Candida albicans*, Saccharomycetaceae; *Trichophyton rubrum*, Arthrodermataceae; N = 8 for all

516 the latter strains and species; these were kindly provided by the Department of Hygiene and

517 Microbiology of the Würzburg University Hospital). Conidiospores were harvested by sampling

518 mature fungus colonies that were reared from stock cultures. A suspension of the conidia in sterile

519 water was evenly distributed on the Petri dishes to obtain uniform growth of fungi. To recreate

520 the concentrations of potential antibiotic volatiles in the brood cell, we used small plastic caps (3

521 ml, about the size of a brood cell) to confine test areas on the agar. Freshly laid eggs were placed

522 singly on the bottom of a cap where they readily attached due to their natural stickiness. Each cap

523 was then placed on a freshly inoculated Petri dish so that the agar under the cap was not in  
524 contact with the egg but was exposed to volatiles that emanated from the egg. An empty cap was  
525 placed on the same Petri dish as a control. The Petri dishes were incubated in a dark climate  
526 chamber at 25°C. Fungus growth under the experimental and control caps was recorded after 24,  
527 48 and 72 h. After 72 h the caps with the hatched larvae were removed, and fungal growth was  
528 further recorded after another 24, 48 and 72 h. Since there was either no fungal growth or  
529 substantial growth (Fig. 3), the experimental and control areas were compared using binomial  
530 tests (software PAST [101]). The qualitative results for all other observation times were identical to  
531 those after 24 h.

532

### 533 Identification of the antimicrobial volatile

534 We hypothesized that nitric oxide ( $\text{NO}^{\cdot}$ ) and its main reaction product with oxygen, nitrogen  
535 dioxide ( $\text{NO}_2^{\cdot}$ ), were the most likely compounds emanating from beewolf eggs. The standard test  
536 for the detection of  $\text{NO}^{\cdot}$  and  $\text{NO}_2^{\cdot}$  employs the Griess reaction. We used a solution of sulfanilic acid  
537 and N-(1-naphthyl)-ethylenediamine (Spectroquant Nitrite Test, Merck, Germany, according to the  
538 manufacturer's instructions). The Griess reagent specifically reacts with the nitrite anion ( $\text{NO}_2^-$ ) to  
539 form a distinctive red azo dye [102].  $\text{NO}^{\cdot}$  reacts with water to form nitrous acid ( $\text{HNO}_2$ ) and can  
540 thus be directly verified by the Griess reaction.  $\text{NO}_2^{\cdot}$ , however, disproportionates in water into  
541 nitrous acid and nitric acid ( $\text{HNO}_3$ ) and the latter must be reduced to nitrous acid to react with the  
542 Griess reagent. Freshly laid beewolf eggs (collected within 2 h after oviposition,  $N = 11$ ) were  
543 placed in the lid of a 1.5 ml reaction tube where they readily attached due to their natural  
544 stickiness. Tubes without eggs ( $N = 11$ ) were used as controls. Then 1 mL of the Griess test solution  
545 was added to the tube. For another sample ( $N = 15$ ) the nitrate, which might be present in the  
546 solution, was reduced to nitrite by placing a glass fiber filter disc with small amounts of zinc  
547 powder [103] on the surface of the solution. The same setting without an egg was used as control

548 (N = 15). The tubes were incubated at 25°C for 24 h, and the occurrence of the red coloration was  
549 examined both visually and with a photometer (at 520 nm, Nanophotometer, Implen, Germany).  
550 The samples with and without nitrate reduction showed the same results.  
551  
552 NO<sup>-</sup> can also be detected by specific fluorescent probes. In particular, diaminorhodamin-4M AM  
553 (DAR4M-AM), a cell permeable, photostable fluorescent dye, has a high sensitivity and specificity  
554 for NO<sup>-</sup> [104]). A DAR4M-AM (Alexis Biochemicals, USA) solution was prepared according to the  
555 supplier's instructions (10µmol/l in 0.1mol/l phosphate buffer, pH 7.4). To verify and to visualize  
556 the emission of NO<sup>-</sup> from the egg, paralyzed honeybees either with freshly laid eggs (N = 8) or  
557 controls without eggs (N = 8) were sprayed with the DAR4M-AM solution using a nebulizer (the  
558 egg itself was screened from droplets during spraying) and kept in the dark (at 25°C in artificial  
559 brood cells as described above). After 20 h, the bees were examined under a fluorescence  
560 microscope (Axiophot II, Zeiss, Germany, filter set 43: excitation 520-570 nm, emission 535-675  
561 nm) and digital photos were taken (Nikon DS-2 Mv, Nikon Japan) at constant exposure times, to  
562 allow comparison of fluorescence intensity. Due to the size of the bees, several pictures had to be  
563 taken in the X,Y plane as well as along the Z axis. Pictures along the z-axis were stacked using the  
564 software Combine-ZP ([www.hadleyweb.pwp.blueyonder.co.uk](http://www.hadleyweb.pwp.blueyonder.co.uk)). Then these stacks were stitched  
565 using Photoshop Elements 5 (PSE5, Adobe Systems Inc. USA). Since small peripheral background  
566 parts within the frame of the stacked and stitched picture were "empty" these parts were filled  
567 with other background parts by using the clone stamp tool. Images were corrected for contrast  
568 and sharpness using PSE5 with identical settings for experimental and control specimens.  
569  
570 DAR4M-AM can also be used to detect NO<sup>-</sup> in tissues. Aliquots of 0.1-0.5 µl of the DAR4M-AM  
571 solution (see above) were injected into beewolf eggs (within 1 h after oviposition, N = 64, in N = 45  
572 eggs the embryo survived and developed) with a custom made microinjector equipped with glass

573 capillaries (Eppendorf Femtotips II, Eppendorf, Germany) under microscopic control. The eggs  
574 were kept in dark chambers (as above), and fluorescence was observed directly after injection and  
575 1, 3, 5, 24, 48 and 72 h later. Control eggs injected with buffer only (N = 10) were monitored in the  
576 same way to assess autofluorescence. For comparison, eggs of two other Hymenoptera (*Osmia*  
577 *bicornis*, Apoidea, Megachilidae, N = 12, and *Ampulex compressa*, Apoidea, Ampulicidae, N = 9;  
578 eggs from both species were obtained from our own laboratory populations) as well as freshly  
579 hatched beewolf larvae (N = 4) were injected with the DAR4M-AM solution and monitored in the  
580 same way. Fluorescence was examined under a fluorescence microscope and documented with a  
581 digital camera as described above. Contrast and sharpness of the images were optimized using  
582 Photoshop Elements 5 (Adobe, USA) with identical settings for all specimens.

583

584 Quantification, time course and temperature dependence of NO<sup>-</sup> production

585 Iodometry provides a simple but sensitive, reliable and precise method to quantify strong  
586 oxidants. To assess the amount of emitted nitrogen oxides, we placed freshly laid eggs (N = 233)  
587 individually into the lid of 1.5 ml reaction tubes where they readily attached due to their natural  
588 stickiness. Then 1 ml of a potassium iodide-starch solution (containing 1% KI and 1% soluble starch  
589 in distilled water) was added, the reaction tube was closed and kept for 24 h at 28°C in a dark  
590 climate chamber. Oxidation of iodide results in iodine that forms a blue complex with starch [103].  
591 The degree of coloration was quantified by measuring the absorbance at 590 nm in a  
592 spectrophotometer (Uvikon 860, Kontron, Germany). To assess the absolute amount of the  
593 oxidant, the solutions were subsequently calibrated by titration with a reference solution of  
594 sodium thiosulfate (concentration: 0.001 M; Merck, Germany) until the blue color of the iodine-  
595 starch complex disappeared.

596

597 To establish the time course of gas production, individual beewolf eggs (N = 4) were transferred  
598 within 1 h after oviposition into the lid of reaction tubes and kept in a dark climate chamber at  
599 28°C. Every hour, the cap with the egg was transferred to another reaction tube with fresh iodide-  
600 starch solution. Immediately after removal of the egg from a reaction tube, absorbance of the  
601 solution was measured at 590 nm as described above.

602

603 To investigate the temperature dependence of gas production, tubes with a newly laid egg and  
604 iodide-starch solution (as described above, N = 33 in total) were placed in a rack (with white  
605 background) inside a climate chamber and incubated at seven different constant temperatures  
606 (20, 22.5, 24, 25.5, 27, 28.5 and 30°C). The time course of coloration of the iodide-starch solution  
607 was recorded using a digital camera (Canon EOS 20D, Canon, Japan) programmed to take pictures  
608 at 30 min intervals. The onset of gas production could be easily determined since the color of the  
609 solution turned from clear to dark blue from one picture to the next, i.e. within a 30 min interval.  
610 A quadratic regression curve was fitted to the data (SPSS Statistics 21) and the Q<sub>10</sub> value for the  
611 temperature dependence was estimated.

612

613 Detection of NOS activity in egg tissue

614 To detect NOS activity in the egg tissue, we used fixation-insensitive NADPH diaphorase staining  
615 with nitroblue tetrazolium [105,106]. Eggs were fixed in PBS containing 4% paraformaldehyde for  
616 2 h at 4°C, followed by cryoprotection in PBS with 12% sucrose for 20 h. The tissue was soaked in  
617 Tissue Tec (Sakura Finetek, Netherlands) for 30 min, frozen, and 10 µm sections were cut on a  
618 cryostat microtome (CM3000, Leica, Germany). The sections were incubated for 60 min at 30°C  
619 with 50 mmol/l Tris-HCl, pH 7.8, 0.1% Triton X-100, and 0.2 mmol/l nitroblue tetrazolium chloride  
620 in the presence or absence (each N = 5) of 0.2 mmol/l β-NADPH to demonstrate fixation-  
621 insensitive NADPH diaphorase activity. The sections were dehydrated, mounted with Depex



622 (Serva, Germany) and observed under a compound microscope (Zeiss Axiophot II). Photos were  
623 taken with a digital camera (Nikon DS-2 Mv). To cover the whole egg, two pictures had to be  
624 stitched (Photoshop Elements 5, Adobe USA) and contrast and sharpness were optimized.  
625  
626 Phenology of NOS gene expression  
627 If NOS is responsible for NO<sup>•</sup> production in beewolf eggs, the time pattern of *NOS* gene expression  
628 should largely resemble the time course of NO<sup>•</sup> production by showing a pronounced peak several  
629 hours after egg laying (the timing of the peak depending on temperature). We used reverse  
630 transcription and real time quantitative PCR to quantify the NOS mRNA in beewolf eggs at  
631 different times after oviposition. Since the amount of mRNA that could be obtained from single  
632 eggs was insufficient to get reproducible results, we pooled 10 eggs in one trial and 24 eggs in a  
633 second trial for each of four different time intervals after oviposition (4-5, 9-10, 14-15 and 19-20 h  
634 after oviposition, all kept at 25°C) as well as the respective number of freshly hatched larvae. The  
635 eggs and larvae were removed from the brood cells at the specified times, shock frozen with liquid  
636 nitrogen and stored at -80°C. The RNA of each sample was extracted using the peqGOLD total RNA  
637 Kit (PepLab, Germany) according to the supplier's instructions and eluted with 20 µL RNase free  
638 water. An aliquot of 3 µL of the RNA was digested with DNaseI (Fermentas, Lithuania) and  
639 transcribed into cDNA with BioScript (Bioline, Germany) using an Oligo-dT primer (Fermentas,  
640 Lithuania) in a final volume of 20 µL. As a reference for basic levels of gene expression during the  
641 experimental period, mRNA of the housekeeping gene β-actin was quantified and the ratio of  
642 NOS/β-actin mRNA was calculated for each sample.  
643  
644 For quantitative PCR, we established new primers for both the NOS and β-actin genes of *P.*  
645 *triangulum* (based on the complete *NOS* sequences, see below) (NOS\_qPCR\_F1 & R4;  
646 Actin\_qPCR\_F1 & R1, Table S1). All primers were intron-overlapping to avoid the measurement of

647 contaminating genomic DNA. The NOS and actin primers amplified fragments of 312bp and 321bp,  
648 respectively. The qPCRs were performed on an Eppendorf Realplex cyclor (Eppendorf, Germany)  
649 in a final volume of 25  $\mu$ L, containing 1  $\mu$ L of template cDNA (1  $\mu$ L of the 20  $\mu$ L RT reaction mix),  
650 2.5  $\mu$ L of each primer (10 pmol/l) and 12.5  $\mu$ L of SYBR Green Mix (SensiMixPlus SYBR Mit,  
651 Quantace, UK). Standard curves were established by using  $10^{-9}$  –  $10^{-3}$  ng of PCR products as  
652 template. A NanoDrop TM1000 spectrophotometer (Peqlab, Germany) was used to measure DNA  
653 concentrations of the templates for the standard curves. PCR conditions were as follows: 95°C for  
654 5 min, followed by 50 cycles of 56°C ( $\beta$ -actin) or 65°C (NOS) for 60 s, 72°C for 60 s and 95°C for 60  
655 s. Then a melting curve analysis was performed by increasing the temperature from 60°C to 95°C  
656 within 20 min. Based on the standard curves, the amount of NOS and  $\beta$ -actin template and their  
657 ratio was calculated.

658

#### 659 NOS inhibition assay

660 To verify the role of NOS in NO<sup>•</sup> production by beewolf eggs, we used an inhibition assay [107].

661 Since L-arginine is the substrate for NO<sup>•</sup> production by NOS, we injected either an inhibiting L-

662 arginine analogue or, for controls, a non-inhibiting enantiomer into freshly laid beewolf eggs.

663 Chemicals were dissolved in 0.1 mol/l phosphate buffer pH 7.4. Using a microinjector (see above)

664 eggs were injected with about 0.2  $\mu$ l of 1.5 mol/l solutions of (1) the competitive inhibitor N $\omega$ -

665 nitro-L-arginine methylester (L-NAME, Sigma-Aldrich, USA) (experimental group, N = 14), or (2) the

666 non-inhibiting N $\omega$ -nitro-D-arginine methylester (D-NAME, Sigma-Aldrich, USA) (control group 1, N

667 = 9) or (3) not injected at all (N = 14, control group 2). Each egg of the three groups was placed

668 individually in the lid of a reaction tube with an iodide-starch solution as described above and

669 incubated for 24 h at 28°C. Then NO<sup>•</sup> production was assessed by measuring absorbance of the

670 solution with a photometer (Implen Nanophotometer) at 590 nm. Statistical comparison of the

671 groups was conducted using Mann-Whitney U-tests with correction after Holm [108] (SPSS  
672 Statistics 18).

673

674 Sequencing of the *P. triangulum* nitric oxide synthase gene (*Pt-NOS*) and mRNA

675 DNA was extracted from female beewolf heads with the Epicentre MasterPure Complete DNA and  
676 RNA Purification kit (Epicentre, USA) according to the manufacturer's guidelines for tissue  
677 extraction. Eggs for RNA extraction were kept at a temperature of 27.5°C (range 26-29°C),  
678 collected 14-15 h after oviposition, immediately frozen in liquid nitrogen and stored at -70°C until  
679 RNA extraction. Twenty eggs were pooled for extraction and homogenized by repeatedly pipetting  
680 in lysis buffer of the PeqGOLD Total RNA kit (Peqlab, Germany). Samples were processed according  
681 to the kit manual and frozen at -70°C. For the full transcriptome sequencing (to obtain the 5'  
682 terminal region) RNA was extracted from the antennae of eight frozen female beewolves  
683 according to manufacturer's protocol 1 of the innuPrep RNA Mini Kit (Analytik Jena, Germany).

684

685 Most of the beewolf *NOS* gene was amplified and sequenced by primer walking. Sequencing  
686 reactions were performed by a commercial service (Seqlab, Germany). Four degenerate primers  
687 (NOS860fwd2, NOS1571rev1, NOS\_seq\_F1\_deg, and NOS\_seq\_R1\_deg) were designed (Table S1)  
688 based on published *NOS* sequences of *Drosophila melanogaster* (U25117.1), *Apis mellifera*  
689 (AB204558.1), *Anopheles stephensi* (AH007775.1), *Rhodnius prolixus* (U59389.1), *Manduca sexta*  
690 (AF062749.1) and *Nasonia vitripennis* (NM\_001168232.1). First, the central region (~700bp,  
691 between NOS860fwd2 & NOS1571rev1) was amplified and sequenced. Based on this sequence, we  
692 designed a pair of *P. triangulum* specific primers (NOS\_qPCR\_F2 and NOS\_qPCR\_R2, Table S1).  
693 Using one specific central and one degenerate terminal primer (NOS\_seq\_F1\_deg and  
694 NOS\_seq\_R1\_deg, Table S1), respectively, fragments of 4-5 kb were amplified and sequenced by  
695 primer walking, which yielded the central 9.5 kb of the *NOS* gene.

696

697 Fragments larger than 2 kb were amplified with the PeqGOLD Mid-Range PCR System on a  
698 thermocycler (TGradient, Biometra, Germany). Reaction volumes of 12.5  $\mu$ L contained 1  $\mu$ L DNA  
699 template, 50 mmol/l Tris-HCl (pH 9.1), 14 mmol/l  $(\text{NH}_4)_2\text{SO}_4$ , 1.75 mmol/l  $\text{MgCl}_2$ , 350 mmol/l of  
700 each dNTP, 400 mmol/l of each primer and 0.5 U 'MidRange PCR' enzyme mix. An initial 3 min  
701 melting step at 94°C was followed by 35 cycles of 0.5 min at 94°C, 0.5 min at 58°C and 3 min+20  
702 sec per cycle at 68°C and a final extension time of 20 min at 68°C.

703

704 Fragments up to 2 kb were amplified using the PeqGOLD Taq. Reaction volumes of 12.5  $\mu$ L  
705 contained 1  $\mu$ L of DNA template, 50 mmol/l Tris-HCl pH 9.1, 14 mmol/l  $(\text{NH}_4)_2\text{SO}_4$ , 3 mmol/l  $\text{MgCl}_2$ ,  
706 240  $\mu$ mol of each dNTP, 800 nmol/l of each primer and 0.5 U Taq. An initial 3 min melting step at  
707 95°C was followed by 35 cycles of 1 min at 95°C, 1 min at 60°C and 2 min at 72°C and a final  
708 extension time of 3 min at 72°C.

709

710 The 3' terminus was sequenced following the 3' RACE protocol [109]. Briefly, cDNA was generated  
711 by reverse transcription with a poly-T primer. Before reverse transcription, co-extracted DNA was  
712 digested using DNaseI (New England Biolabs, UK). The DNA digestion mix contained 1 mmol/l Tris-  
713 HCl, 0.25 mmol/l  $\text{MgCl}_2$  and 1 mmol/l  $\text{CaCl}_2$  and 0.4 U DNaseI. DNA was digested for 10 min at  
714 37°C, followed by DNase inactivation for 10 min at 75°C. The final reverse transcription mix  
715 contained 25 mmol/l KCL, 10 mmol/l Tris-HCl, 0,6 mmol/l  $\text{MgCl}_2$ , 2 mmol/l DTT, 4  $\mu$ mol poly-T or  
716 gene specific primer, 0.5 mmol/l of each dNTP and 200 U of BioSkript Moloney Murine Leukaemia  
717 Virus reverse transcriptase (Bioline, Germany). The entire digestion mixture was incubated with  
718 the primer for 5 min at 70°C to enable primer annealing, then cooled on ice. Reverse transcription  
719 was carried out for 1 h at 42°C and the enzyme was subsequently inactivated for 10 min at 70°C.  
720 The cDNA including the 3' terminal region was amplified with the specific primer NOS\_seq\_3-F3

721 and a 'poly-T adapter primer', i.e. a polyT primer to which a specific adapter sequence was added  
722 [109] (Table S1). Subsequently, a nested PCR was performed using a second specific primer  
723 (NOS\_seq\_3-F6) and a primer that contained only the specific adapter sequence of the 'polyT  
724 adapter primer' to increase PCR specificity (Table S1, same PCR conditions as above).  
725  
726 The 5' terminal region of 200 bp was obtained from a full transcriptome sequencing approach of  
727 female antennae, which covered the full-length NOS mRNA sequence. RNA sequencing was  
728 performed by a commercial service provider (Fasteris, Switzerland), using the HiSeq TM2000  
729 Sequencing System (Illumina, USA) with 100 bp single reads, on 5 µg total RNA isolated from  
730 female *P. triangulum* antennae. CLC Genomics Workbench was used for sequence assembly of the  
731 resulting 75 million reads. Reads were quality-trimmed with standard settings and subsequently  
732 assembled using the following CLC parameters: nucleotide mismatch cost = 2; insertion cost = 2;  
733 deletion cost = 2; length fraction = 0.3; similarity = 0.9. Conflicts among the individual bases were  
734 resolved by voting for the base with highest frequency. Contigs shorter than 250 bp were  
735 discarded.  
736  
737 To sequence the entire NOS transcript from eggs, cDNA was generated by reverse transcription  
738 with a poly-T primer and additionally a specific, central NOS\_RT\_R1 primer, followed by PCR  
739 amplification using various primer combinations to cover the whole transcript sequence (Table  
740 S1). Additionally, the sequence of the 5' terminal region was confirmed by RT-PCR of mRNA from  
741 *P. triangulum* eggs, using primers NOS\_seq\_5-F6 and NOS\_seq\_5-R3 (Table S1) and subsequent  
742 sequencing.  
743  
744 Even though we used a large number of primers to cover the gene, we did not find sections with  
745 signals for two different bases at the same site. Thus we infer that there is only one *NOS* gene in

746 the *P. triangulum* genome, as in most invertebrates [110]. In addition, the transcriptome dataset  
747 did not reveal any other transcript that was annotated as nitric oxide synthase.

748

749 The GenBank accession numbers for the *P. triangulum* *NOS* (*Pt-NOS*) gene sequence is: KJ425525,  
750 for the *NOS* mRNA of *P. triangulum* eggs: KJ425526, and for the *NOS* mRNA in *P. triangulum*  
751 female antennae: KJ425527.

752

753 Phylogenetic analysis of *NOS* gene sequences

754 *NOS* coding sequences of 23 insect species from five orders were acquired from the NCBI

755 database. Along with the *P. triangulum* *NOS* sequence, these were translated and aligned using

756 Geneious (Version 6.0.5, created by Biomatters, Geneious, New Zealand). The highly variable 5'

757 end was trimmed. An approximately-maximum-likelihood tree was created with FastTree [111,

758 112]. Local support values were estimated with the Shimodaira-Hasegawa test based on 1,000

759 samples without re-optimizing the branch lengths for the resampled alignments [111]. Bayesian

760 estimates were made with the program MrBayes 3.1.2 [113-115]. The MCMC analysis was

761 conducted under a mixed amino acid rate model (prset aamodelpr= mixed). After 1,000,000

762 generations, with trees sampled every 1000 generations, the standard deviation of split

763 frequencies was consistently lower than 0.01. We discarded the first 100 of the sampled trees

764 (10% burn-in) and computed a 50% majority rule consensus tree with posterior probability values

765 for every node. The trees estimated by both methods were nearly identical, so they were

766 combined into a single figure.

767

768

769 **Acknowledgements:** We are grateful to Wilhelm Boland for advice, to Nathalie Moske for  
770 technical assistance, to Stephan Schneuwly for providing the microinjection device and, in  
771 particular, to Jon Seger and Jeremy Field for valuable comments on earlier drafts of the  
772 manuscript.

773

#### 774 **Author Contributions**

775 Conceptualization ES

776 Methodology ES TE MK GH JR

777 Formal Analysis ES TE

778 Investigation ES TE GH JR MK

779 Resources ES JR

780 Writing – Original Draft Preparation ES TE

781 Writing – Review & Editing ES TE GH MK JR

782 Visualization ES TE

783 Supervision ES

784 Funding Acquisition ES

785

786 **Statement on competing interests: We declare that none of the authors has any competing**

787 **interests.**

788

789

790

791

792

793 References

- 794 1. Gilliam M, Taber III S, Richardson GV. Hygienic behavior of honey bees in relation to  
795 chalkbrood disease. *Apidologie*. 1983;14(1):29-39.
- 796 2. Herzner G, Schlecht A, Dollhofer V, Parzefall C, Harrar K, Kreuzer A, et al. Larvae of the  
797 parasitoid wasp *Ampulex compressa* sanitize their host, the American cockroach, with a blend  
798 of antimicrobials. *Proc Natl Acad Sci U S A*. 2013;110(4):1369-74.
- 799 3. Vilcinskas A, Mukherjee K, Vogel H. Expansion of the antimicrobial peptide repertoire in the  
800 invasive ladybird *Harmonia axyridis*. *Proc R Soc Lond B Biol Sci*. 2013;280(1750).
- 801 4. Gross J, Schumacher K, Schmidtberg H, Vilcinskas A. Protected by fumigants: beetle perfumes  
802 in antimicrobial defense. *J Chem Ecol*. 2008;34(2):179-88.
- 803 5. Hooper LV, Littman DR, Macpherson AJ. Interactions between the microbiota and the immune  
804 system. *Science*. 2012;336(6086):1268-73.
- 805 6. Iwasaki A, Medzhitov R. Regulation of adaptive immunity by the innate immune system.  
806 *Science*. 2010;327(5963):291-5.
- 807 7. Kaltenpoth M, Göttler W, Herzner G, Strohm E. Symbiotic Bacteria Protect Wasp Larvae from  
808 Fungal Infestation. *Curr Biol*. 2005;15(5):475-9.
- 809 8. Flórez LV, Scherlach K, Gaube P, Ross C, Sitte E, Hermes C, et al. Antibiotic-producing  
810 symbionts dynamically transition between plant pathogenicity and insect-defensive  
811 mutualism. *Nat Commun*. 2017;8.
- 812 9. Janzen D. Why fruits rot, seeds mold, and meat spoils. *Am Nat*. 1977;111:691-713.
- 813 10. Rozen D, Engelmoer D, Smiseth P. Antimicrobial strategies in burying beetles breeding on  
814 carrion. *Proc Natl Acad Sci U S A*. 2008;105(46):17890-5.
- 815 11. Wilson K, Cotter SC. Host-parasite interactions and the evolution of immune defense. *Adv*  
816 *Study Behav*. 2013;45:81-174.



- 817 12. Tranter C, Graystock P, Shaw C, Lopes J, Hughes W. Sanitizing the fortress: protection of ant  
818 brood and nest material by worker antibiotics. *Behav Ecol Sociobiol.* 2014;68(3):499-507.
- 819 13. Arce AN, Smiseth PT, Rozen DE. Antimicrobial secretions and social immunity in larval burying  
820 beetles, *Nicrophorus vespilloides*. *Anim Behav.* 2013;86(4):741-5.
- 821 14. Strohm E, Linsenmair KE. Allocation of parental investment among individual offspring in the  
822 European beewolf *Philanthus triangulum* F. (Hymenoptera: Sphecidae). *Biol J Linn Soc Lond.*  
823 2000;69:173-92.
- 824 15. Engl T, Bodenstern B, Strohm E. Mycobiota in the brood cells of the European beewolf,  
825 *Philanthus triangulum* (Hymenoptera: Crabronidae). *Europ J Entomol.* 2016;113:271.
- 826 16. Strohm E, Linsenmair KE. Females of the European beewolf preserve their honeybee prey  
827 against competing fungi. *Ecol Entomol.* 2001;26(2):198-203.
- 828 17. Herzner G, Ruther J, Goller S, Schulz S, Goettler W, Strohm E. Structure, chemical composition  
829 and putative function of the postpharyngeal gland of the emerald cockroach wasp, *Ampulex*  
830 *compressa* (Hymenoptera, Ampulicidae). *Zoology.* 2011;114:36-45.
- 831 18. Herzner G, Schmitt T, Peschke K, Hilpert A, Strohm E. Food wrapping with the postpharyngeal  
832 gland secretion by females of the European beewolf *Philanthus triangulum*. *J chem ecol.*  
833 2007;33(4):849-59.
- 834 19. Herzner G, Strohm E. Fighting fungi with physics: Food wrapping by a solitary wasp prevents  
835 water condensation. *Curr Biol.* 2007;17(2):R46-R7.
- 836 20. Herzner G, Engl T, Strohm E. Cryptic combat against competing microbes is a costly  
837 component of parental care in a digger wasp. *Anim Behav.* 2011;82(2):321-8.
- 838 21. Strohm E, Linsenmair KE. Leaving the cradle: how beewolves (*Philanthus triangulum* F.) obtain  
839 the necessary spatial information for emergence. *Zoology.* 1994/95;98:137-46.
- 840 22. Mücke W, Lemmen C. Duft und Geruch: Wirkungen und gesundheitliche Bedeutung von  
841 Geruchsstoffen. Landsberg am Lech: ecomed - Storck GmbH; 2010.

- 842 23. Andersen D, Colombani J, Leopold P. Coordination of organ growth: principles and  
843 outstanding questions from the world of insects. *Trends Cell Biol.* 2013;23(7):336-44.
- 844 24. Soegiarto L, Wills R, Seberry J, Leshem Y. Nitric oxide degradation in oxygen atmospheres and  
845 rate of uptake by horticultural produce. *Postharvest Biol Technol.* 2003;28(2):327-31.
- 846 25. Mur LA, Mandon J, Cristescu SM, Harren FJ, Prats E. Methods of nitric oxide detection in  
847 plants: a commentary. *Plant Science.* 2011;181(5):509-19.
- 848 26. Fang FC. Perspectives series: host/pathogen interactions. Mechanisms of nitric oxide-related  
849 antimicrobial activity. *J Clin Invest.* 1997;99(12):2818.
- 850 27. Lai T, Li B, Qin G, Tian S. Oxidative damage involves in the inhibitory effect of nitric oxide on  
851 spore germination of *Penicillium expansum*. *Curr microbiol.* 2011;62(1):229-34.
- 852 28. Tsikas D. Analysis of nitrite and nitrate in biological fluids by assays based on the Griess  
853 reaction: appraisal of the Griess reaction in the L-arginine/nitric oxide area of research. *J*  
854 *Chromatogr B.* 2007;851(1):51-70.
- 855 29. Röszer T. The biology of subcellular nitric oxide. Heidelberg: Springer; 2012.
- 856 30. Regulski M, Tully T. Molecular and biochemical characterization of dNOS: a *Drosophila*  
857 *Ca<sup>2+</sup>/calmodulin-dependent nitric oxide synthase*. *Proc Natl Acad Sci U S A.* 1995;92(20):9072-  
858 6.
- 859 31. Rivero A. Nitric oxide: an antiparasitic molecule of invertebrates. *Trends Parasitol.*  
860 2006;22(5):219-25.
- 861 32. Whitten M, Sun F, Tew I, Schaub G, Soukou C, Nappi A, et al. Differential modulation of  
862 *Rhodnius prolixus* nitric oxide activities following challenge with *Trypanosoma*  
863 *rangeli*, *T. cruzi* and bacterial cell wall components. *Insect Biochem Mol Biol.*  
864 2007;37(5):440-52.
- 865 33. Akira S, Uematsu S, Takeuchi O. Pathogen recognition and innate immunity. *Cell.* [Review].  
866 2006 Feb;124(4):783-801.

- 867 34. Hirano M, Das S, Guo P, Cooper MD. The Evolution of Adaptive Immunity in Vertebrates. In:  
868 Alt FW, Austen KF, Honjo T, Melchers F, Uhr JW, Unanue ER, editors. *Adv Immunol*, Vol 109.  
869 San Diego: Elsevier Academic Press Inc; 2011. p. 125-57.
- 870 35. Lemaitre B, Hoffmann J. The host defense of *Drosophila melanogaster*. *Annu Rev Immunol*.  
871 [Review; Book Chapter]. 2007;25:697-743.
- 872 36. Siva-Jothy MT, Moret Y, Rolff J. Insect immunity: An evolutionary ecology perspective. In:  
873 Simpson SJ, editor. *Advances in Insect Physiology*, Vol 32. San Diego: Elsevier Academic Press  
874 Inc; 2005. p. 1-48.
- 875 37. Gorman M, Kankanala P, Kanost M. Bacterial challenge stimulates innate immune responses  
876 in extra-embryonic tissues of tobacco hornworm eggs. *Insect Mol Biol*. 2004;13(1):19-24.
- 877 38. Otti O, Tragust S, Feldhaar H. Unifying external and internal immune defences. *Trends Ecol*  
878 *Evol*. 2014;29(11):625-34.
- 879 39. Degenkolb T, Düring R-A, Vilcinskis A. Secondary metabolites released by the burying beetle  
880 *Nicrophorus vespilloides*: chemical analyses and possible ecological functions. *J Chem Ecol*.  
881 2011;37(7):724-35.
- 882 40. Vander Meer RK, Morel L. Ant queens deposit pheromones and antimicrobial agents on eggs.  
883 *Naturwissenschaften*. 1995;82(2):93-5.
- 884 41. Marchini D, Marri L, Rosetto M, Manetti AG, Dallai R. Presence of Antibacterial Peptides on  
885 the Laid Egg Chorion of the Medfly *Ceratitis capitata*. *Biochem Biophys Res Commun*.  
886 1997;240(3):657-63.
- 887 42. Flórez LV, Biedermann PH, Engl T, Kaltenpoth M. Defensive symbioses of animals with  
888 prokaryotic and eukaryotic microorganisms. *Nat Prod Rep*. 2015;32(7):904-36.
- 889 43. Tragust S, Mitteregger B, Barone V, Konrad M, Ugelvig LV, Cremer S. Ants disinfect fungus-  
890 exposed brood by oral uptake and spread of their poison. *Curr Biol*. 2013;23(1):76-82.

- 891 44. Gross J, Schmidtberg H. Glands of leaf beetle larvae—protective structures against attacking  
892 predators and pathogens. *Research on Chrysomelidae*, Volume 2: Brill; 2009. p. 177-90.
- 893 45. Lopes RB, Laumann RA, Blassioli-Moraes MC, Borges M, Faria M. The fungistatic and fungicidal  
894 effects of volatiles from metathoracic glands of soybean-attacking stink bugs (Heteroptera:  
895 Pentatomidae) on the entomopathogen *Beauveria bassiana*. *J Invertebr Pathol.* 2015;132:77-  
896 85.
- 897 46. Kroiss J, Kaltenpoth M, Schneider B, Schwinger MG, Hertweck C, Maddula RK, et al. Symbiotic  
898 streptomycetes provide antibiotic combination prophylaxis for wasp offspring. *Nat Chem Biol.*  
899 2010.
- 900 47. Kaltenpoth M, Roeser-Mueller K, Koehler S, Peterson A, Nechitaylo TY, Stubblefield JW, et al.  
901 Partner choice and fidelity stabilize coevolution in a Cretaceous-age defensive symbiosis. *Proc*  
902 *Natl Acad Sci U S A.* 2014;111(17):6359-64.
- 903 48. Moroz LL, Kohn AB. On the comparative biology of Nitric oxide (NO) synthetic pathways:  
904 parallel evolution of NO-mediated signaling. *Adv Exp Biol.* 2007;1:1-44.
- 905 49. Thomas DD, Miranda KM, Citrin D, Espey MG, Wink DA. Nitric oxide. *Combat Medicine:*  
906 Springer; 2003. p. 23-60.
- 907 50. Filipovic MR, Koh AC, Arbault Sp, Niketic V, Debus A, Schleicher U, et al. Striking Inflammation  
908 from Both Sides: Manganese (II) Pentaazamacrocyclic SOD Mimics Act Also as Nitric Oxide  
909 Dismutases: A Single Cell Study. *Angew Chem Int Ed Engl.* 2010;49(25):4228-32.
- 910 51. Lüth H-J, Münch G, Arendt T. Aberrant expression of NOS isoforms in Alzheimer's disease  
911 is structurally related to nitrotyrosine formation. *Brain research.* 2002;953(1):135-43.
- 912 52. Pacher PI, Beckman JS, Liaudet L. Nitric oxide and peroxynitrite in health and disease. *Physiol*  
913 *Rev.* 2007;87(1):315-424.
- 914 53. Titheradge MA. Nitric oxide in septic shock. *Biochimica et Biophysica Acta (BBA)-*  
915 *Bioenergetics.* 1999;1411(2):437-55.

- 916 54. Burke AJ, Sullivan FJ, Giles FJ, Glynn SA. The yin and yang of nitric oxide in cancer progression.  
917 Carcinogenesis. 2013;34(3):503-12.
- 918 55. Beckman JS, Koppenol WH. Nitric oxide, superoxide, and peroxynitrite: the good, the bad, and  
919 the ugly. Am J Physiol-Cell Physiol. 1996;40(5):C1424.
- 920 56. Wink DA, Hines HB, Cheng RY, Switzer CH, Flores-Santana W, Vitek MP, et al. Nitric oxide and  
921 redox mechanisms in the immune response. J Leukoc Biol. 2011;89(6):873-91.
- 922 57. Jones ML, Ganopolsky JG, Labbé A, Wahl C, Prakash S. Antimicrobial properties of nitric oxide  
923 and its application in antimicrobial formulations and medical devices. Appl Microbiol  
924 Biotechnol. 2010;88(2):401-7.
- 925 58. Feelisch M. The chemical biology of nitric oxide—an outsider's reflections about its role in  
926 osteoarthritis. Osteoarthritis and Cartilage. 2008;16:S3-S13.
- 927 59. Canessa P, Larrondo LF. Environmental responses and the control of iron homeostasis in  
928 fungal systems. Appl Microbiol Biotechnol. 2013;97(3):939-55.
- 929 60. Bogdan C. Nitric oxide and the immune response. Nat Immunol. 2001;2(10):907-16.
- 930 61. Vaughn MW, Kuo L, Liao JC. Estimation of nitric oxide production and reaction rates in tissue  
931 by use of a mathematical model. Am J Physiol Heart Circ Physiol. 1998;274(6):H2163-H76.
- 932 62. Ghaffari A, Miller C, McMullin B, Ghahary A. Potential application of gaseous nitric oxide as a  
933 topical antimicrobial agent. Nitric Oxide. 2006;14(1):21-9.
- 934 63. Lazar E, Wills R, Ho B, Harris A, Spohr L. Antifungal effect of gaseous nitric oxide on mycelium  
935 growth, sporulation and spore germination of the postharvest horticulture pathogens,  
936 *Aspergillus niger*, *Monilinia fructicola* and *Penicillium italicum*. Lett Appl Microbiol.  
937 2008;46(6):688-92.
- 938 64. Administration USOSaH. Directorate of Technical Support and Emergency Management  
939 (DTSEM). United States Department of Labor; 2014 [cited 2014]; Available from:  
940 <https://www.osha.gov/dts/>.

- 941 65. Castillo L, Beaumier L, Ajami AM, Young VR. Whole body nitric oxide synthesis in healthy men  
942 determined from [15N] arginine-to-[15N] citrulline labeling. Proc Natl Acad Sci U S A.  
943 1996;93(21):11460-5.
- 944 66. Wu G, Flynn NE, Flynn SP, Jolly CA, Davis PK. Dietary protein or arginine deficiency impairs  
945 constitutive and inducible nitric oxide synthesis by young rats. J Nutr. 1999;129(7):1347-54.
- 946 67. Zeidler D, Zähringer U, Gerber I, Dubery I, Hartung T, Bors W, et al. Innate immunity in  
947 Arabidopsis thaliana: lipopolysaccharides activate nitric oxide synthase (NOS) and induce  
948 defense genes. Proc Natl Acad Sci U S A. 2004;101(44):15811-6.
- 949 68. Luckhart S, Vodovotz Y, Cui L, Rosenberg R. The mosquito *Anopheles stephensi* limits malaria  
950 parasite development with inducible synthesis of nitric oxide. Proc Natl Acad Sci U S A.  
951 1998;95(10):5700-5.
- 952 69. Luckhart S, Li K. Transcriptional complexity of the *Anopheles stephensi* nitric oxide synthase  
953 gene. Insect Biochem Mol Biol. 2001;31(3):249-56.
- 954 70. Smith BC, Underbakke ES, Kulp DW, Schief WR, Marletta MA. Nitric oxide synthase domain  
955 interfaces regulate electron transfer and calmodulin activation. Proc Natl Acad Sci U S A.  
956 2013;110(38):E3577-E86.
- 957 71. Salerno JC, Harris DE, Irizarry K, Patel B, Morales AJ, Smith SM, et al. An autoinhibitory control  
958 element defines calcium-regulated isoforms of nitric oxide synthase. J Biol Chem.  
959 1997;272(47):29769-77.
- 960 72. Wong M-L, Rettori V, Amer A-S, Bongiorno PB, Canteros G, McCann SM, et al. Inducible nitric  
961 oxide synthase gene expression in the brain during systemic inflammation. Nat Med.  
962 1996;2(5):581-4.
- 963 73. Morris Jr SM. Arginine synthesis, metabolism, and transport: regulators of nitric oxide  
964 synthesis. Cell Mol Biol Nitric Oxide. 1999:57-85.

- 965 74. Gao S-H, Fan L, Yuan Z, Bond PL. The concentration-determined and population-specific  
966 antimicrobial effects of free nitrous acid on *Pseudomonas aeruginosa* PAO1. *Appl Microbiol*  
967 *Biotechnol.* 2015;99(5):2305-12.
- 968 75. de Paulo Martins V, Dinamarco TM, Curti C, Uyemura SA. Classical and alternative  
969 components of the mitochondrial respiratory chain in pathogenic fungi as potential  
970 therapeutic targets. *J Bioenerg Biomembr.* 2011;43(1):81-8.
- 971 76. Zhou S, Fushinobu S, Nakanishi Y, Kim S-W, Wakagi T, Shoun H. Cloning and characterization  
972 of two flavohemoglobins from *Aspergillus oryzae*. *Biochem Biophys Res Commun.*  
973 2009;381(1):7-11.
- 974 77. Kaltenpoth M, Schmitt T, Strohm E. Hydrocarbons in the antennal gland secretion of female  
975 European beewolves, *Philanthus triangulum* (Hymenoptera, Crabronidae). *Chemoecology.*  
976 2009;19(4):219-25.
- 977 78. Fang FC. Antimicrobial reactive oxygen and nitrogen species: concepts and controversies. *Nat*  
978 *Rev Microbiol.* 2004;2(10):820-32.
- 979 79. Wang J, Higgins VJ. Nitric oxide has a regulatory effect in the germination of conidia of  
980 *Colletotrichum coccodes*. *Fungal Genet Biol.* 2005;42(4):284-92.
- 981 80. Bogdan C, Röllinghoff M, Diefenbach A. Reactive oxygen and reactive nitrogen intermediates  
982 in innate and specific immunity. *Curr Opin Immunol.* 2000;12(1):64-76.
- 983 81. Morris Jr SM. Regulation of arginine availability and its impact on NO synthesis. *Nitric oxide*  
984 *biol pathobiol.* 2000:187-97.
- 985 82. Barbehenn RV, Reese JC, Hagen KS. The food of insects. *Ecol Entomol.* 1999:83-121.
- 986 83. Payne SH, Loomis WF. Retention and loss of amino acid biosynthetic pathways based on  
987 analysis of whole-genome sequences. *Eukaryot cell.* 2006;5(2):272-6.
- 988 84. Berenbaum MR. Turnabout is fair play: secondary roles for primary compounds. *J Chem Ecol.*  
989 1995;21(7):925-40.



- 990 85. Uchida K. Balanced amino acid composition essential for infusion-induced egg development in  
991 the mosquito (*Culex pipiens pallens*). *J Insect Physiol.* 1993;39(7):615-21.
- 992 86. Sasaki T, Ishikawa H. Production of essential amino acids from glutamate by mycetocyte  
993 symbionts of the pea aphid, *Acyrtosiphon pisum*. *J Insect Physiol.* 1995;41(1):41-6.
- 994 87. Gündüz EA, Douglas A. Symbiotic bacteria enable insect to use a nutritionally inadequate diet.  
995 *Proc R Soc Lond B Biol Sci.* 2009;276(1658):987-91.
- 996 88. Erhardt A, Rusterholz H-P. Do peacock butterflies (*Inachis io* L.) detect and prefer nectar  
997 amino acids and other nitrogenous compounds? *Oecologia.* 1998;117(4):536-42.
- 998 89. O'Brien DM, Boggs CL, Fogel ML. Pollen feeding in the butterfly *Heliconius charitonia*: isotopic  
999 evidence for essential amino acid transfer from pollen to eggs. *Proc R Soc Lond B Biol Sci.*  
1000 2003;270(1533):2631-6.
- 1001 90. Mesquita RD, Vionette-Amaral RJ, Lowenberger C, Rivera-Pomar R, Monteiro FA, Minx P, et al.  
1002 Genome of *Rhodnius prolixus*, an insect vector of Chagas disease, reveals unique adaptations  
1003 to hematophagy and parasite infection. *Proc Natl Acad Sci U S A.* 2015;112(48):14936-41.
- 1004 91. Thompson S. The amino acid requirements for larval development of the hymenopterous  
1005 parasitoid *Exeristes roborator* Fabricius (Hymenoptera: Ichneumonidae). *Comp Biochem*  
1006 *Physiol A Mol Integr Physiol.* 1976;53(2):211-3.
- 1007 92. Barrett M, Schmidt J. A comparison between the amino acid composition of an egg parasitoid  
1008 wasp and some of its hosts. *Entomol Exp Appl.* 1991;59(1):29-41.
- 1009 93. De Groot A. Amino acid requirements for growth of the honeybee (*Apis mellifica* L.).  
1010 *Experientia.* 1952;8(5):192-4.
- 1011 94. Weiner CN, Hilpert A, Werner M, Linsenmair KE, Blüthgen N. Pollen amino acids and flower  
1012 specialisation in solitary bees. *Apidologie.* 2010;41(4):476-87.
- 1013 95. Förstermann U, Sessa WC. Nitric oxide synthases: regulation and function. *Eur Heart J.*  
1014 2012;33(7):829-37.



- 1015 96. Davies S-A. Nitric oxide signalling in insects. *Insect Biochem Mol Biol*. 2000;30(12):1123-38.
- 1016 97. Guzik T, Korbust R, Adamek-Guzik T. Nitric oxide and superoxide in inflammation. *J Physiol*
- 1017 *Pharmacol*. 2003;54:469-87.
- 1018 98. Calabrese V, Mancuso C, Calvani M, Rizzarelli E, Butterfield DA, Stella AMG. Nitric oxide in the
- 1019 central nervous system: neuroprotection versus neurotoxicity. *Nat Rev Neurosci*.
- 1020 2007;8(10):766-75.
- 1021 99. Pautz A, Art J, Hahn S, Nowag S, Voss C, Kleinert H. Regulation of the expression of inducible
- 1022 nitric oxide synthase. *Nitric Oxide*. 2010;23(2):75-93.
- 1023 100. Atlas RM. *Handbook of microbiological media*: CRC press; 2004.
- 1024 101. Hammer Ø, Harper D, Ryan P. PAST-Palaeontological statistics. [www.uv.es/~](http://www.uv.es/~pardomv/pe/2001_1/past/pastprog/past.pdf)
- 1025 [pardomv/pe/2001\\_1/past/pastprog/past.pdf](http://www.uv.es/~pardomv/pe/2001_1/past/pastprog/past.pdf), acessado em. 2001;25(07):2009.
- 1026 102. Guevara I, Iwanejko J, Dembinska-Kieca A, Pankiewicz J, Wanat A, Anna P, et al. Determination
- 1027 of nitrite/nitrate in human biological material by the simple Griess reaction. *Clin Chim Acta*.
- 1028 1998;274(2):177-88.
- 1029 103. Jander G, Blasius E. *Einführung in das anorganisch-chemische Praktikum*. Stuttgart: Hirzel;
- 1030 1971.
- 1031 104. Kojima H, Hirotsani M, Urano Y, Kikuchi K, Higuchi T, Nagano T. Fluorescent indicators for nitric
- 1032 oxide based on rhodamine chromophore. *Tetrahedron Lett*. 2000;41(1):69-72.
- 1033 105. Virgili M, Poli A, Beraudi A, Giuliani A, Villani L. Regional distribution of nitric oxide synthase
- 1034 and NADPH-diaphorase activities in the central nervous system of teleosts. *Brain Res*.
- 1035 2001;901(1):202-7.
- 1036 106. Müller U. Ca<sup>2+</sup>/Calmodulin-dependent Nitric Oxide Synthase in *Apis mellifera* and
- 1037 *Drosophila melanogaster*. *Eur J Neurosci*. 1994;6(8):1362-70.

- 1038 107. Willmot M, Gibson C, Gray L, Murphy S, Bath P. Nitric oxide synthase inhibitors in  
1039 experimental ischemic stroke and their effects on infarct size and cerebral blood flow: a  
1040 systematic review. *Free Radic Biol Med.* 2005;39(3):412-25.
- 1041 108. Holm S. A simple sequentially rejective multiple test procedure. *Scand Stat Theory Appl.*  
1042 1979;65-70.
- 1043 109. Sambrook J, Russell DW. *Molecular cloning: a laboratory manual. Volume 1–3.* Cold Spring  
1044 Harbor, New York: Cold Spring Harbor Laboratory Press; 2001.
- 1045 110. Labbe P, McTaggart SJ, Little TJ. An ancient immunity gene duplication in *Daphnia*  
1046 *magna*: RNA expression and sequence analysis of two nitric oxide synthase genes. *Dev*  
1047 *Comp Immunol.* 2009;33(9):1000-10.
- 1048 111. Price MN, Dehal PS, Arkin AP. FastTree 2 - approximately maximum-likelihood trees for large  
1049 alignments. *PLoS One.* 2010;5(3):e9490.
- 1050 112. Price MN, Dehal PS, Arkin AP. FastTree: computing large minimum evolution trees with  
1051 profiles instead of a distance matrix. *Mol Biol Evol.* 2009;26(7):1641-50.
- 1052 113. Huelsenbeck JP, Ronquist F. MRBAYES: Bayesian inference of phylogenetic trees.  
1053 *Bioinformatics.* 2001;17(8):754-5.
- 1054 114. Huelsenbeck JP, Ronquist F, Nielsen R, Bollback JP. Bayesian inference of phylogeny and its  
1055 impact on evolutionary biology. *Science.* 2001;294(5550):2310-4.
- 1056 115. Ronquist F, Huelsenbeck JP. MrBayes 3: Bayesian phylogenetic inference under mixed models.  
1057 *Bioinformatics.* 2003;19(12):1572-4.

1058

1059

1 **Supporting information**

2 **SI Figures**

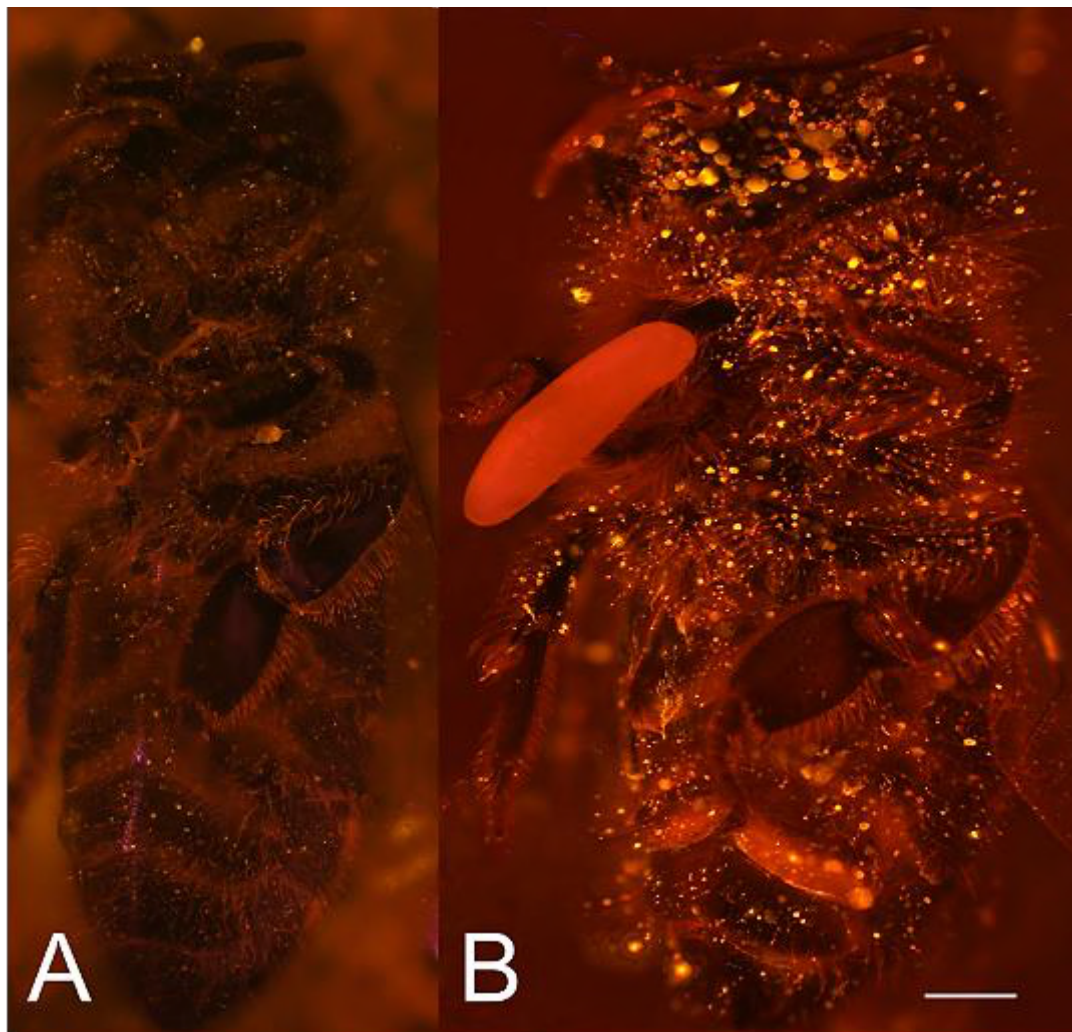

3

4 Figure S1. Visualization of NO<sup>•</sup> emission by beewolf eggs using fluorescence imaging. (A) Honeybee from a  
5 brood cell without an egg and (B) honeybee with egg. Both bees were sprayed with a solution of the NO<sup>•</sup>  
6 specific fluorescence probe DAR4M-AM. Only the droplets on the bee with the egg (B) show a bright yellow  
7 and orange fluorescence indicating the presence of NO<sup>•</sup>. Image is a composite of multiple pictures of the x/y  
8 plane and z-axis. Scale bar = 1 mm.

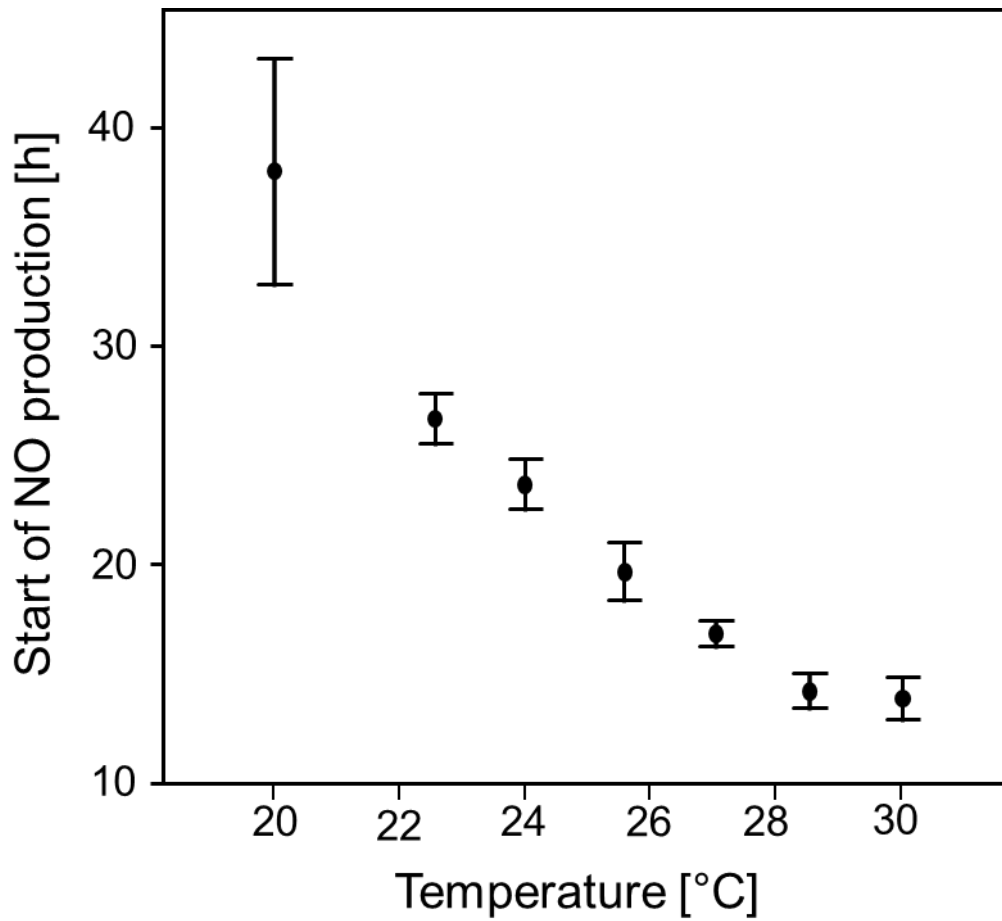

9

10 Figure S2. Start of NO<sup>-</sup> emission (h after oviposition) as a function of temperature. Beewolf eggs were kept  
11 at different temperatures and the onset of NO<sup>-</sup> release was assessed using the color change of an iodide  
12 starch solution as monitored by a digital camera at 30min intervals. Symbols are means  $\pm$  SD (Quadratic  
13 regression:  $R^2 = 0.98$ ,  $N = 33$ ,  $p < 0.001$ ;  $Q_{10} = 2.74$ ). Source data file: Fig S2 Source data - start of NO  
14 emission.xlsx

15

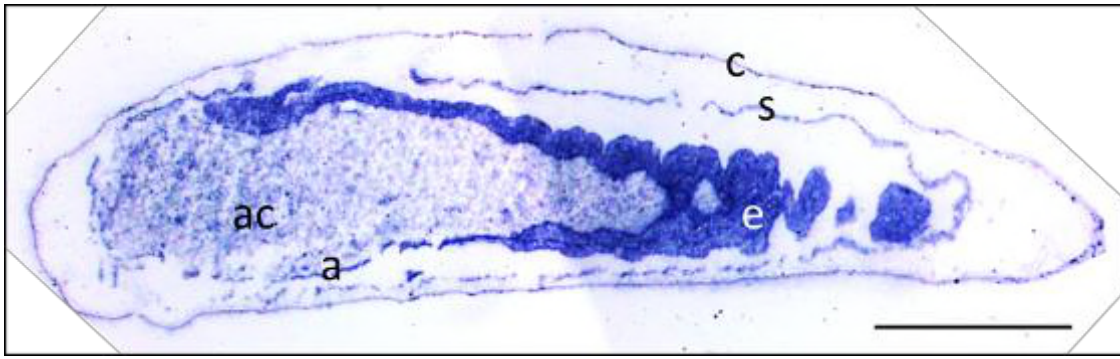

16

17 Figure S3. Photomicrograph of a longitudinal section of a beewolf egg showing fixation insensitive NADPH-  
18 diaphorase activity. Strong blue staining in the embryonic tissue indicates the presence of reduced  
19 nitroblue tetrazolium demonstrating NOS activity (c=cuticle, s=serosa, e= embryo, a=amnion, ac= amnion  
20 cavity, scale bar = 1 mm, image composed from two separate photos of the left and right parts of the egg.).

21

22

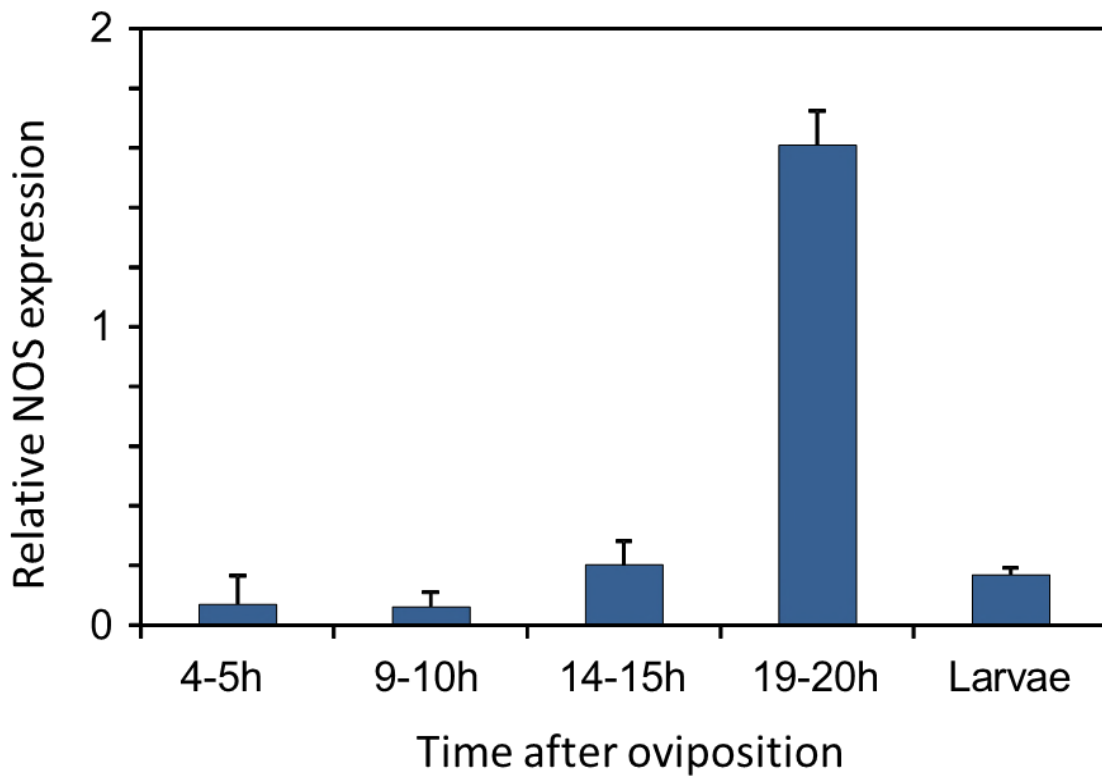

23

24 Figure S4. Gene expression of NOS relative to  $\beta$ -actin in beewolf eggs at different times after oviposition  
25 and in freshly hatched larvae. Two trials were conducted, one with 19 and one with 24 eggs per time point.  
26 Mean ratios of NOS-mRNA to  $\beta$ -Actin-mRNA are shown (with standard deviations), as determined by Q-RT-  
27 PCR. Source data file: Fig S4 Source data - NOS gene expression.xlsx

28

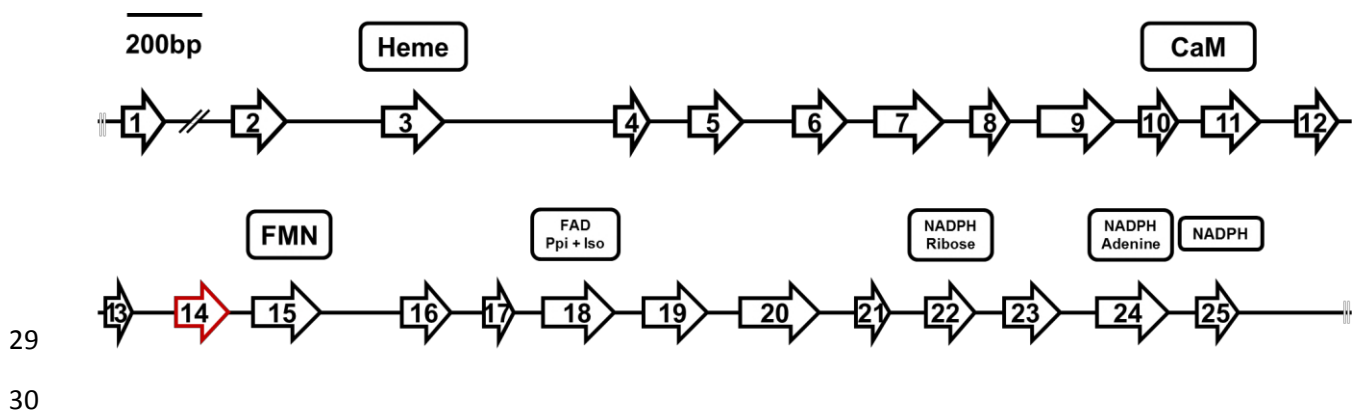

31 Figure S5. Structure of the *Pt-NOS* gene indicating position and length of exons. Exon 14 (red) is missing in  
32 the NOS mRNA in beewolf eggs compared to adults. Presumed cofactor-binding domains as deduced from  
33 homologous sequences of the *NOS* of *Anopheles stephensi* [68, 69] are indicated for heme, calmodulin  
34 (CaM), FMN, FAD pyrophosphate (FAD PPI) and FAD isoalloxazine (FAD Iso), NADPH ribose, NADPH adenine,  
35 and NADPH.



36

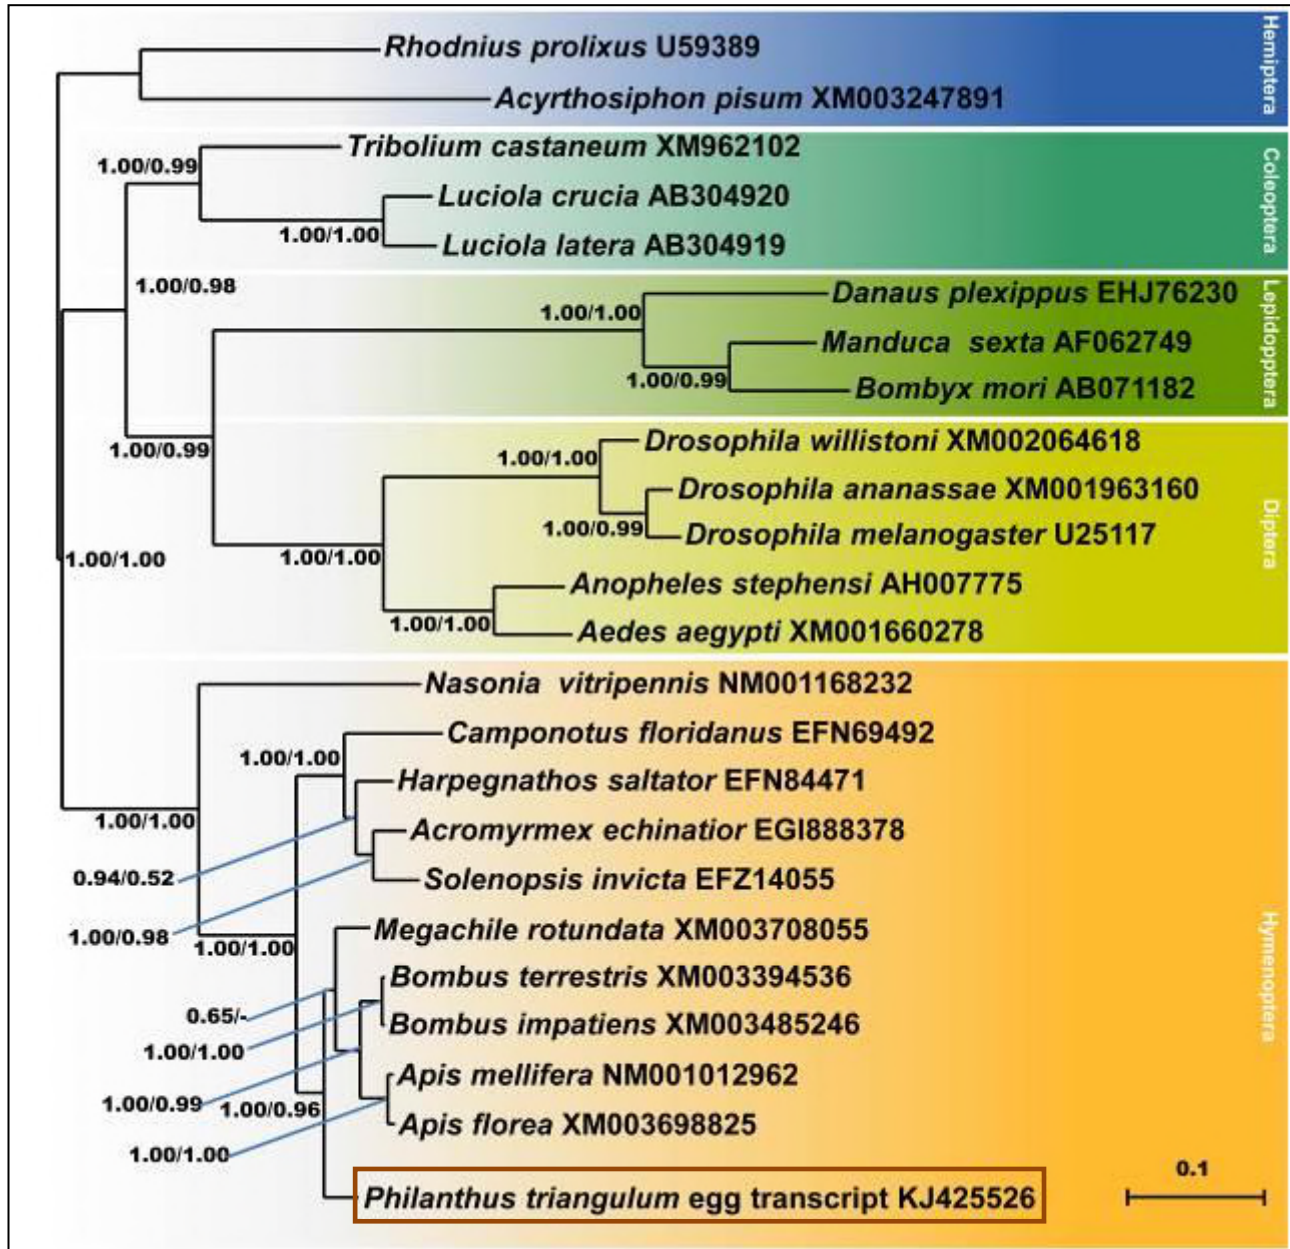

37

38 Figure S6. Consensus tree obtained from Bayesian analysis of NOS amino acid sequences from five orders of  
 39 insects (distinguished by different colors), including the NOS sequences of *P. triangulum* eggs (lowermost  
 40 entry). Values at the nodes represent Bayesian posterior probabilities and local support values (FastTree  
 41 analysis), respectively. Scale bar represents 0.1 changes per site.

42

43
